# Supplementary material
Source: MDPI journal article supplement (https://www.mdpi.com/2076-3417/11/5/2424)
Supplement: s1 [file s1]

Supplementary Material

# Optimal Planning Method for Large-Scale Historical Exhibits in the Taiwan Railway Museum

Lin Pey Fan \* and Tzu How Chu

Department of Geography, National Taiwan University, Taipei 10617, Taiwan; gis127@ntu.edu.tw

\* Correspondence: D04228003@ntu.edu.tw, Tel.: 886-2-33665830

**Table S1.** The raw data of collected objects for NRMT.

| Name           | Type     | Storage Location               | Manufacturer           | Year | Cultural Relic History                                                                                                                                                                                                                                                                                                                                                                                                                                                                                                                                                                                                                                                                                                                                                                                       | Size: Length × Width × Height (mm) | Weight (Ton) |
|----------------|----------|--------------------------------|------------------------|------|--------------------------------------------------------------------------------------------------------------------------------------------------------------------------------------------------------------------------------------------------------------------------------------------------------------------------------------------------------------------------------------------------------------------------------------------------------------------------------------------------------------------------------------------------------------------------------------------------------------------------------------------------------------------------------------------------------------------------------------------------------------------------------------------------------------|------------------------------------|--------------|
| Float rail-car | 25SA4101 | Taipei Inspection Depot Garage | Taipei Railway Factory | 1912 | It was built in 1912 to congratulate the Emperor of Japan on his enthronement and to prepare for the imperial family to visit Taiwan. It was manufactured by Taipei Railway Works (the predecessor of Taipei Machinery Factory). When Crown Prince Hirohito visited Taiwan in 1913, he traveled from Keelung all the way to the south to patrol the scenic spots in western Taiwan. He took this rail-car. The body and beams of this car are made of Taiwan teak. The interior decoration of the vehicle is mainly made of Taiwan's Alishan high-grade cypress and phoebe. The interior is finely carved, like a small artistic palace. The space in the vehicle is divided into five zones, which are the toilet, guest room (secondary room), main room, bedroom, and service room (slave room) in order. | 16,400 × 2706 × 3619               | 24.6         |
| Float rail-car | 20SA4102 | Taipei Inspection Depot Garage | Taipei Railway Factory | 1904 | Built in 1904, it was built by the Taipei Railway Works of the Ministry of Railways of Taiwan (the predecessor of Taipei Machine Works). It is a special                                                                                                                                                                                                                                                                                                                                                                                                                                                                                                                                                                                                                                                     | 13,988 × 2616 × 3467               | 17.58        |

|                      |           |                                |                                                                     |      |                                                                                                                                                                                                                                                                                                                                                                                                                                                                                                                                                                                                                                                                                                                                                                                                                                                                                                                                                                                                                                                                                                                                                                                                                                                                                                                                                                                                                                                                                                                                                                 |                      |       |
|----------------------|-----------|--------------------------------|---------------------------------------------------------------------|------|-----------------------------------------------------------------------------------------------------------------------------------------------------------------------------------------------------------------------------------------------------------------------------------------------------------------------------------------------------------------------------------------------------------------------------------------------------------------------------------------------------------------------------------------------------------------------------------------------------------------------------------------------------------------------------------------------------------------------------------------------------------------------------------------------------------------------------------------------------------------------------------------------------------------------------------------------------------------------------------------------------------------------------------------------------------------------------------------------------------------------------------------------------------------------------------------------------------------------------------------------------------------------------------------------------------------------------------------------------------------------------------------------------------------------------------------------------------------------------------------------------------------------------------------------------------------|----------------------|-------|
| Float rail-car       | 35SA32820 | Taipei Inspection Depot Garage | National Army Retirement Counseling Committee of the Executive Yuan | 1967 | <p>float for the Governor of Taiwan and is known as the "Governor float". The body and beams of this railcar are made of Taiwan teak, and the interior is mainly made of Taiwanese cypress and phoebe. The interior is furnished with sofas, bedrooms, electric lights, fans, and Western toilets, etc., and there is a balcony at the rear of the railcar.</p> <p>The 35SP32820 sightseeing railcar purchased in 1967 was commissioned to design and construct the Taoyuan Wood Factory of the National Army Retirement Guidance Committee of the Executive Yuan. The renovation was completed in 58 and it is scheduled to be used for inspections by the head of state. It is one of the "presidential floats" Good name. The body of this car is designed with a steel body structure, which is specially designed for the use of the head of state. Mr. Jiang's late President Jieshi and Mr. Jiang's late President Jieshi were not allowed to ride. On December 31, 1991, the entire South-Boundary Railway was opened to traffic. Former President Lee Teng-hui patrolled the car for the first time. However, this was only one time and never used it again.</p> <p>In the early period (about 1957), the American aid bus was purchased and transformed (formerly No. 35SP32712). The interior is divided into three sections (observation room, dining room and lounge). The most special thing is that there is an outdoor observation deck at the rear of the vehicle. You can go out to enjoy the view. It has been used since 1971, and the</p> | 20,000 × 2885 × 3800 | 31.25 |
| Living room rail-car | 35PC32701 | Taipei Inspection Depot        | Taipei Machinery Plant Renovation                                   | 1971 | <p>float for the Governor of Taiwan and is known as the "Governor float". The body and beams of this railcar are made of Taiwan teak, and the interior is mainly made of Taiwanese cypress and phoebe. The interior is furnished with sofas, bedrooms, electric lights, fans, and Western toilets, etc., and there is a balcony at the rear of the railcar.</p> <p>The 35SP32820 sightseeing railcar purchased in 1967 was commissioned to design and construct the Taoyuan Wood Factory of the National Army Retirement Guidance Committee of the Executive Yuan. The renovation was completed in 58 and it is scheduled to be used for inspections by the head of state. It is one of the "presidential floats" Good name. The body of this car is designed with a steel body structure, which is specially designed for the use of the head of state. Mr. Jiang's late President Jieshi and Mr. Jiang's late President Jieshi were not allowed to ride. On December 31, 1991, the entire South-Boundary Railway was opened to traffic. Former President Lee Teng-hui patrolled the car for the first time. However, this was only one time and never used it again.</p> <p>In the early period (about 1957), the American aid bus was purchased and transformed (formerly No. 35SP32712). The interior is divided into three sections (observation room, dining room and lounge). The most special thing is that there is an outdoor observation deck at the rear of the vehicle. You can go out to enjoy the view. It has been used since 1971, and the</p> | 20,000 × 2885 × 3953 | 31.48 |

|                                |           |                                         |                                                 |      |                                                                                                                                                                                                                                                                                                                                                                                                                                                                                                                                                                                                                                                                                                                                                                                                                                                                                                                                                                                                                                                                                                                                                                                                                                                                                                                                                                                                                                                                                                                                                                        |                      |      |
|--------------------------------|-----------|-----------------------------------------|-------------------------------------------------|------|------------------------------------------------------------------------------------------------------------------------------------------------------------------------------------------------------------------------------------------------------------------------------------------------------------------------------------------------------------------------------------------------------------------------------------------------------------------------------------------------------------------------------------------------------------------------------------------------------------------------------------------------------------------------------------------------------------------------------------------------------------------------------------------------------------------------------------------------------------------------------------------------------------------------------------------------------------------------------------------------------------------------------------------------------------------------------------------------------------------------------------------------------------------------------------------------------------------------------------------------------------------------------------------------------------------------------------------------------------------------------------------------------------------------------------------------------------------------------------------------------------------------------------------------------------------------|----------------------|------|
| Second class passenger railcar | 35SP32426 | Kaohsiung Port                          | Japan Kawasaki Corporation                      | 1966 | <p>chariot that served as the head of state in the early days was opened for rent in 1983.</p> <p>In 1966 (Republic of China 55), it was purchased by Japan Kawasaki Co., Ltd., and it was installed with a domestically made turn-back chair, one of the main railcars. In May 2010 (Republic of China), he retired.</p> <p>It was manufactured by the Taipei Railway Works (now Taipei Machine Works) in 1921.</p> <p>In 1961, it was converted into an engineering camping car ES2053, which should be antique in shape. In 1996, Taiwan Railway restored this national treasure-class wooden passenger railcar to its original appearance. This car is a third-class wooden passenger railcar. The lookout model is its characteristic. The interior and exterior of the railcar, the seats, the luggage rack, the floor and the roof are all made of wood, especially the wooden sunshade, although it has been used a long time, it still shows the exquisite craftsmanship of the masters.</p> <p>It was built by Taiwan Railway Taipei Machinery Factory in 1953 and 25TPK2053; in 1991, it was converted into an engineering camper ES2502. Due to its antique shape, in 1996, Taiwan Railway restored this national treasure-class wooden passenger railcar to its original appearance. This car is a second-class wooden passenger car. Although it was manufactured after the war, it still looks like a Japanese 17m-class passenger car. Compared with the 25TPK2053 wooden passenger car, it has a design with no lookout, other things like inside</p> | 20,000 × 2865 × 3953 | 31.2 |
| Wooden passenger railcar       | 25TPK2053 | Miaoli Railway Heritage Exhibition Hall | Taipei Railway Works (now Taipei Machine Works) | 1921 | <p>It was built by Taiwan Railway Taipei Machinery Factory in 1953 and 25TPK2053; in 1991, it was converted into an engineering camper ES2502. Due to its antique shape, in 1996, Taiwan Railway restored this national treasure-class wooden passenger railcar to its original appearance. This car is a second-class wooden passenger car. Although it was manufactured after the war, it still looks like a Japanese 17m-class passenger car. Compared with the 25TPK2053 wooden passenger car, it has a design with no lookout, other things like inside</p>                                                                                                                                                                                                                                                                                                                                                                                                                                                                                                                                                                                                                                                                                                                                                                                                                                                                                                                                                                                                       | 16,544 × 2744 × 3750 |      |
| Wooden passenger railcar       | 30SPK2502 | Miaoli Railway Heritage Exhibition Hall | Taiwan Railway Taipei Machinery Factory         | 1953 | <p>It was built by Taiwan Railway Taipei Machinery Factory in 1953 and 25TPK2053; in 1991, it was converted into an engineering camper ES2502. Due to its antique shape, in 1996, Taiwan Railway restored this national treasure-class wooden passenger railcar to its original appearance. This car is a second-class wooden passenger car. Although it was manufactured after the war, it still looks like a Japanese 17m-class passenger car. Compared with the 25TPK2053 wooden passenger car, it has a design with no lookout, other things like inside</p>                                                                                                                                                                                                                                                                                                                                                                                                                                                                                                                                                                                                                                                                                                                                                                                                                                                                                                                                                                                                       | 17,262 × 2900 × 3780 |      |

|                                 |          |                                         |                   |                                                                                                                                                                                                                                                                                                                                                                                                                                                                                                                                                                                                                                                                                                                                                                                                                                                                                                                                        |                      |
|---------------------------------|----------|-----------------------------------------|-------------------|----------------------------------------------------------------------------------------------------------------------------------------------------------------------------------------------------------------------------------------------------------------------------------------------------------------------------------------------------------------------------------------------------------------------------------------------------------------------------------------------------------------------------------------------------------------------------------------------------------------------------------------------------------------------------------------------------------------------------------------------------------------------------------------------------------------------------------------------------------------------------------------------------------------------------------------|----------------------|
| Narrow gauge passenger carriage | LTPB1813 | Miaoli Railway Heritage Exhibition Hall | Japan             | <p>and outside the railcar. The equipment, seats, luggage rack, floor, sunshade (using gauze type) and roof are the same as 25TPK2053. They are made of wood and are equipped with seven sets of electric fans, screen windows, shade cloth and other equipment.</p> <p>The trailer of the Eastern Narrow Gauge Guanghua LDR2300 diesel passenger vehicle was imported from Japan in 1970. As the upper part of the body is painted white and the lower part is yellow, the locals call it "yellow vehicle". After the widening of the Huadong gauge in 1982, it was discontinued, gifted to the Penghu County Government and displayed in the Penghu County Cultural Center. In cooperation with the establishment of the Miaoli Railway Heritage Museum of the Taiwan Railway Administration, it was transported to the Taipei Machinery Factory for renovation in December 1999, and the display was completed on May 26, 2000.</p> | 11,000 × 2300 × 3200 |
| Alishan Passenger railcar       | SPC2     | Miaoli Railway Heritage Exhibition Hall | Japanese vehicles | <p>1971</p> <p>This train is a towed passenger car used in the Alishan Forest Railway Zhongxing diesel passenger train set. It was manufactured by the Japanese Vehicle Company in 1971 and contains 28 plastic leather chairs. In order to meet the requirements of the Alishan Forest Railway passenger trains for advancing operation when going up the mountain, one end of the passenger car is equipped with a captain's room and a window on the end, which can monitor the safety of the train's traveling direction when it is advancing. It was disabled in 1982.</p>                                                                                                                                                                                                                                                                                                                                                        | 9000 × 2000 × 1500   |

|                                              |          |                                         |                                                    |      |                                                                                                                                                                                                                                                                                                                                                                                                                                                                                                                                                                                                                                                                                                                                                                                                                                                                                                                                                                                                                                                                                                                                                                                                                                                                                                                                   |                      |
|----------------------------------------------|----------|-----------------------------------------|----------------------------------------------------|------|-----------------------------------------------------------------------------------------------------------------------------------------------------------------------------------------------------------------------------------------------------------------------------------------------------------------------------------------------------------------------------------------------------------------------------------------------------------------------------------------------------------------------------------------------------------------------------------------------------------------------------------------------------------------------------------------------------------------------------------------------------------------------------------------------------------------------------------------------------------------------------------------------------------------------------------------------------------------------------------------------------------------------------------------------------------------------------------------------------------------------------------------------------------------------------------------------------------------------------------------------------------------------------------------------------------------------------------|----------------------|
| Narrow gauge wooden sleeper railcar          | LTPB1375 | Hualien Locomotive Depot                | Japan Railway Ministry Hualien Port Repair Factory | 1943 | <p>The narrow-gauge Ginseng and other passenger railcars were manufactured in 1943 by the Hualien Port Repair Factory (the predecessor of Hualien Machinery Factory) of the Japanese Ministry of Railways. It runs on the eastern trunk line with a gauge of 762 cm. After the expansion of the Huadong Line in June 1982, it succeeded in retreating. Due to its simple shape and wooden carriage, it is of great preservation value. It was designated as a railway cultural relic and was restored by the Kaohsiung Machinery Factory of the Bureau in 2000 and kept in the Hualien Locomotive Depot.</p> <p>The narrow-gauge ginseng and other passenger and sleeping railcar were manufactured by the Hualien Port Repair Plant (the predecessor of Hualien Machinery Plant) of the Japanese Ministry of Railways in 1930 and traveled on the eastern main line. It features guest bedroom equipment, which can be used for long-distance night travelers to and from Hualien and Taitung. It is the only narrow-gauge passenger sleeper in the world. After the expansion of the Huadong Line in June 1982, it succeeded in retreating. Due to its simple shape and wooden carriage, it is of great preservation value. It was refurbished by Kaohsiung Machinery Factory in 2000 and kept in Hualien Locomotive Depot.</p> | 10,364 × 2229 × 3166 |
| Narrow gauge wooden sleeper railcar          | LTPS1102 | Hualien Locomotive Depot                | Japan Railway Ministry Hualien Port Repair Factory | 1930 | <p>It was manufactured by Beigang Sugar Co., Ltd. of Dainippon Sugar Co., Ltd. in 1941. It is a two-axle internal combustion passenger car used for sugar business inspections and</p>                                                                                                                                                                                                                                                                                                                                                                                                                                                                                                                                                                                                                                                                                                                                                                                                                                                                                                                                                                                                                                                                                                                                            | 10,583 × 2394 × 3229 |
| Taiwan Sugar Official Patrol engineering car | 254      | Miaoli Railway Heritage Exhibition Hall | Dainippon Sugar Co., Ltd. Beigang Sugar Works      | 1941 |                                                                                                                                                                                                                                                                                                                                                                                                                                                                                                                                                                                                                                                                                                                                                                                                                                                                                                                                                                                                                                                                                                                                                                                                                                                                                                                                   | 4665 × 1660 × 2190   |

sugar industry track inspections. There is bridge equipment at both ends. This model was initially equipped with a Ford B eight-cylinder gasoline engine. After Taiwan's recovery, the GMC engine was replaced due to the old engine. The maximum speed can reach 40km/h. Due to the shrinkage of the sugar industry in the province, the sugar railway was completely abolished, and the car entered history. The existing No. 254 car is placed in the Miaoli Exhibition Hall of Railway Cultural Relics.

Manufactured in 1917 by Japan's Osaka Automobile Manufacturing Joint Venture. It is the main locomotive of the northern branch lines, which has the advantages of light and quick action and less coal consumption. After being scrapped in December 1974, it was

placed in the fan-shaped garage of the Chiayi Locomotive Depot. In May 1997, it was transported back to Taipei Machinery Plant for re-drive and repair. It was completed on May 25, 1998. It is currently placed in the fan-shaped garage of the Changhua Locomotive Depot, providing special train operation.

Manufactured by Japanese vehicles in 1936. Specially drive Jiji branch line. After being scrapped in June 1979, it was first stored at the Xinbeitou Station in Danshui Town. After the MRT started, it was moved to the Taiwan Railway Beitou Staff Training Center for display. On September 14, 2000, it was transported back to the Taipei Machinery Plant of the

|                  |       |                            |                                                    |      |                                                                                                                                                                                                                                                                                                                                                                       |                      |       |
|------------------|-------|----------------------------|----------------------------------------------------|------|-----------------------------------------------------------------------------------------------------------------------------------------------------------------------------------------------------------------------------------------------------------------------------------------------------------------------------------------------------------------------|----------------------|-------|
| Steam locomotive | CK101 | Changhua fan-shaped garage | Japan Osaka Automobile Manufacturing Joint Venture | 1917 | placed in the fan-shaped garage of the Chiayi Locomotive Depot. In May 1997, it was transported back to Taipei Machinery Plant for re-drive and repair. It was completed on May 25, 1998. It is currently placed in the fan-shaped garage of the Changhua Locomotive Depot, providing special train operation.                                                        | 11,404 × 2616 × 3658 | 48.99 |
| Steam locomotive | CK124 | Changhua fan-shaped garage | Japanese vehicles                                  | 1936 | Manufactured by Japanese vehicles in 1936. Specially drive Jiji branch line. After being scrapped in June 1979, it was first stored at the Xinbeitou Station in Danshui Town. After the MRT started, it was moved to the Taiwan Railway Beitou Staff Training Center for display. On September 14, 2000, it was transported back to the Taipei Machinery Plant of the | 11,350 × 3936 × 3900 | 50.85 |

|                  |       |                                         |                                                    |      |                                                                                                                                                                                                                                                                                                                                                                                                                                                                                                                                                                 |                                  |        |
|------------------|-------|-----------------------------------------|----------------------------------------------------|------|-----------------------------------------------------------------------------------------------------------------------------------------------------------------------------------------------------------------------------------------------------------------------------------------------------------------------------------------------------------------------------------------------------------------------------------------------------------------------------------------------------------------------------------------------------------------|----------------------------------|--------|
| Steam locomotive | DT668 | Changhua fan-shaped garage              | Japan Kawasaki Shipbuilding (Hyogo) Corporation    | 1940 | Taiwan Railway Administration for re-drive and repair. It was completed on April 30, 2001. It is currently placed in the fan-shaped garage of the Zhang Locomotive Depot, providing special train operation.                                                                                                                                                                                                                                                                                                                                                    | $19,730 \times 2890 \times 3980$ | 124.46 |
|                  |       |                                         |                                                    |      | Manufactured by Japan Kawasaki Shipbuilding (Hyogo) Corporation in 1940. One of the largest steam locomotives of the Taiwan Railway Administration, with a speed of 85 km/h, it is a dual-purpose locomotive with superior performance. The restoration was completed on October 28, 2011, and the cultural assets dynamic display of the Taiwan Railway Administration was added.                                                                                                                                                                              |                                  |        |
|                  |       |                                         |                                                    |      | Manufactured by Kawasaki Shipbuilding (Hyogo) Corporation, Japan in 1943. One of the fastest steam locomotives of the Taiwan Railway Administration and the main locomotive for passenger transportation. In June 1982, due to the completion of the widening of the eastern route, it was suspended. It was transported back to the Taiwan Railway Administration from Changhua Taiwan Folk Village on February 2, 2010. The Taipei Machinery Factory was restored in mid-2012 and joined the Taiwan Railway Administration's cultural assets dynamic display. |                                  |        |
| Steam locomotive | CT273 | Changhua fan-shaped garage              | Japan Kawasaki Shipbuilding (Hyogo) Corporation    | 1943 | In June 1982, due to the completion of the widening of the eastern route, it was suspended. It was transported back to the Taiwan Railway Administration from Changhua Taiwan Folk Village on February 2, 2010. The Taipei Machinery Factory was restored in mid-2012 and joined the Taiwan Railway Administration's cultural assets dynamic display.                                                                                                                                                                                                           | $20,280 \times 2936 \times 3945$ | 115.25 |
| Steam locomotive | CT152 | Miaoli Railway Heritage Exhibition Hall | Japan Osaka Automobile Manufacturing Joint Venture | 1919 | Manufactured in 1919 by Japan's Osaka Automobile Manufacturing Joint Venture. It is a steam locomotive for feeder and passenger and cargo. In 1947, it participated in the opening ceremony of the Neiwan Line from Hsinchu to                                                                                                                                                                                                                                                                                                                                  | $16,775 \times 2616 \times 3885$ | 78.57  |

|                               |        |                                         |                             |      |                                                                                                                                                                                                                                                                                                                                                                                                                                                                                                                                         |                                  |       |
|-------------------------------|--------|-----------------------------------------|-----------------------------|------|-----------------------------------------------------------------------------------------------------------------------------------------------------------------------------------------------------------------------------------------------------------------------------------------------------------------------------------------------------------------------------------------------------------------------------------------------------------------------------------------------------------------------------------------|----------------------------------|-------|
| Steam locomotive              | DT561  | Miaoli Railway Heritage Exhibition Hall | American Locomotive Company | 1919 | Zhudong. After the electrification of the railway in July 1979, it was suspended.<br>Manufactured by American Locomotive Company in the United States in December 1919 (arrived in Taiwan in May 1920). The main locomotive for freight. The only American-made steam locomotive in Taiwan.                                                                                                                                                                                                                                             | $10,306 \times 2591 \times 3747$ | 91.14 |
| Narrow gauge steam locomotive | LDK59  | Hualien Locomotive Depot                | Hitachi Mfg. Co., Ltd.      | 1930 | Manufactured in 1930 by Hitachi Manufacturing in Japan. In June 1982, the Huadong Line was decommissioned after the gauge widening was completed. It was given to the Taitung County Government and displayed in Taitung Liyushan Park. After refurbishing the running part of the car in Hsinchu in February 2001, it was sent back to Hualien Locomotive Depot. The restoration was completed in 2010 and is currently stored in the Hualien Locomotive Depot for dynamic display.                                                    | $7422 \times 2261 \times 3042$   | 21.6  |
| Narrow gauge steam locomotive | LDK58  | Taipei Main Station                     | Japan Vehicle Association   | 1923 | Manufactured by the Japan Automobile Association in 1923. Uses the central buffer chain coupling and adopts the car side water tank device. In June 1982, the Huadong Line was closed after the completion of the widening. It was shipped to Magong, Penghu on September 7, 1985, presented to the Penghu County Government and displayed at the County Cultural Center. On October 21, 1999, it was transported from Penghu to Taipei Machinery Plant for refurbishment. On June 8, 2000, the restoration was successfully completed. | $7217 \times 2286 \times 3100$   | 21.6  |
| Narrow gauge steam locomotive | LDT103 | Hualien Railway Museum                  | Japan Vehicle Association   | 1942 | Manufactured in 1942 by the Japan Automobile Association in Japan. It is the only coal-water                                                                                                                                                                                                                                                                                                                                                                                                                                            | $14,346 \times 2235 \times 3200$ | 40.48 |



|                               |         |                                         |                                       |      |                                                                                                                                                                                                                                                                                                                                                                                                                                                                                                                                                                                                                                                                                                                                                                                                                                                                                                                        |                    |
|-------------------------------|---------|-----------------------------------------|---------------------------------------|------|------------------------------------------------------------------------------------------------------------------------------------------------------------------------------------------------------------------------------------------------------------------------------------------------------------------------------------------------------------------------------------------------------------------------------------------------------------------------------------------------------------------------------------------------------------------------------------------------------------------------------------------------------------------------------------------------------------------------------------------------------------------------------------------------------------------------------------------------------------------------------------------------------------------------|--------------------|
| Steam locomotive<br>Alishan   | 28      | Miaoli Railway Heritage Exhibition Hall | American LIMA Company                 | 1913 | locomotive among steam locomotives on the Huadong Line.                                                                                                                                                                                                                                                                                                                                                                                                                                                                                                                                                                                                                                                                                                                                                                                                                                                                | 9870 × 2000 × 3020 |
|                               |         |                                         |                                       |      | It was displayed in Meilun Mountain Park in Hualien after the suspension of the Eastern Route's diesel power in 1969. It was refurbished by Hualien Machinery Factory in May 2000 and is currently placed in the Hualien Railway Heritage Museum.                                                                                                                                                                                                                                                                                                                                                                                                                                                                                                                                                                                                                                                                      |                    |
|                               |         |                                         |                                       |      | Manufactured in 1913 by the American company LIMA. It is a special steam locomotive for mountain railways. In order to meet the multiple bends and poor track conditions of mountain railways, the design is changed to an upright cylinder. The drive shaft is driven through the crankshaft, and the power is transmitted from the bevel gear to the driving wheel on the bogie. Since the design of this type of locomotive is still rare in the history of the world's railways, there are currently very few of the same type of locomotive remaining around the world. Decommissioned successively in 1973. In 1935, two 15-ton three-acting axle light rail water tank steam locomotives purchased by Dainippon Sugar Co., Ltd. from Japan Rolling Stock Co., Ltd. were decommissioned due to the full diesel power of the sugar industry railway. It is now placed in Miaoli Railway Heritage Exhibition Hall. |                    |
| Taiwan Sugar Steam Locomotive | 331     | Miaoli Railway Heritage Exhibition Hall | Japan Vehicle Association             | 1935 | In 1953, it was purchased by the Forest Service Bureau from Japan's New Mitsubishi Heavy Industries. This type of locomotive was originally designed with three moving axles. Later due to poor cornering performance, a pair of guide wheels were added to the front and                                                                                                                                                                                                                                                                                                                                                                                                                                                                                                                                                                                                                                              | 5800 × 1910 × 3370 |
| Alishan diesel locomotive     | 11403-1 | Miaoli Railway Heritage Exhibition Hall | Japan New Mitsubishi Heavy Industries | 1953 |                                                                                                                                                                                                                                                                                                                                                                                                                                                                                                                                                                                                                                                                                                                                                                                                                                                                                                                        | 9250 × 1955 × 3100 |

|                                          |         |                                         |                                       |      |                                                                                                                                                                                                                                                                                                                                                                                                                                                                                                                                                                                                                                                                                                                                                                                                                                                                                                                                                                                                                                                                                                                                                                                                                                                                                                                                                                                                                                                                                                                                       |                      |
|------------------------------------------|---------|-----------------------------------------|---------------------------------------|------|---------------------------------------------------------------------------------------------------------------------------------------------------------------------------------------------------------------------------------------------------------------------------------------------------------------------------------------------------------------------------------------------------------------------------------------------------------------------------------------------------------------------------------------------------------------------------------------------------------------------------------------------------------------------------------------------------------------------------------------------------------------------------------------------------------------------------------------------------------------------------------------------------------------------------------------------------------------------------------------------------------------------------------------------------------------------------------------------------------------------------------------------------------------------------------------------------------------------------------------------------------------------------------------------------------------------------------------------------------------------------------------------------------------------------------------------------------------------------------------------------------------------------------------|----------------------|
| Alishan diesel locomotive                | 11403-5 | Miaoli Railway Heritage Exhibition Hall | Japan New Mitsubishi Heavy Industries | 1955 | <p>rear of the locomotive as a response. However, the overall performance is still poor, so it is mostly used in the flat area between Chiayi and Zhuqi. It was discontinued in 1982.</p> <p>In 1955, the Forest Service purchased it from Japan's New Mitsubishi Heavy Industries, using Bo-Bo axle configuration. Although the cornering performance of this locomotive was improved, the engine output was insufficient to fully replace the shay-type steam locomotive, so it was deactivated in 1982.</p> <p>In 1969, it was manufactured by the Japanese Rolling Stock Company, and it drove freight trains on the narrow-gauge railway of the Eastern Line. The center is the driver's cab, and the front and rear devices are equipped with power engines, which operate synchronously to increase horsepower. It is the main model of eastern freight. In June 1982, the East Line Railway was widened. The wheelbase of the axles was widened (reserved for new cars) and allocated to various locomotive depots for shunting. After 1986, they were scrapped. Currently stored in Hualien Machinery Factory.</p> <p>In September 1970, the Hualien Repair Factory (the predecessor of Hualien Engine Factory) used spare cummins diesel engines, reversing machines and bogies to design and assemble the LDH101 diesel-hydraulic locomotive. This is the first diesel-hydraulic locomotive in the history of China's railways. The locomotive is a dual-purpose machine for the main line/shunting of light railways.</p> | 9500 × 2050 × 3020   |
| Narrow gauge diesel-hydraulic locomotive | DH210   | Hualien Machinery Factory               | Japan Vehicle Company                 | 1969 |                                                                                                                                                                                                                                                                                                                                                                                                                                                                                                                                                                                                                                                                                                                                                                                                                                                                                                                                                                                                                                                                                                                                                                                                                                                                                                                                                                                                                                                                                                                                       | 11,800 × 2450 × 3600 |
| Narrow gauge diesel electric locomotive  | LDH101  | Miaoli Railway Heritage Exhibition Hall | Hualien Repair Shop                   | 1970 |                                                                                                                                                                                                                                                                                                                                                                                                                                                                                                                                                                                                                                                                                                                                                                                                                                                                                                                                                                                                                                                                                                                                                                                                                                                                                                                                                                                                                                                                                                                                       | 15,000 × 2300 × 3300 |

It was only retired after the east line was widened and completed in June 1982. It was transported to the Cultural Center of Magong, Penghu for display in September 1985. It was moved and placed in 2000. Miaoli Exhibition Hall of Railway Cultural Relics. Although this model did not enter mass production due to various reasons, Hualien Machinery Factory, with limited technology and resources at the time, built the first self-made diesel-hydraulic locomotive in the history of railways, which can be regarded as a milestone in the history of Taiwan railway vehicle technology.

The western main line of the Taiwan Railways began to power diesel. The diesel electric locomotives initially introduced were purchased from Hitachi, Japan in 1960. After that, the purchase of two vehicles originally under warranty was added, for a total of 12 vehicles.

The engine of this model adopts a diesel engine with an exhaust turbocharger through technical cooperation between Germany and Japan. The engine was modified by Taiwan Railway maintenance technicians for power equipment. In 1971, the engine was tested and converted into a Qimu 645E engine. Six vehicles were refitted one after another. This type of car was scrapped in 1996, and currently only the R6 car is displayed in the Miaoli Museum.

In 1966, it was manufactured by the American GM Company. There are 21 vehicles in total, mainly for shunting. The biggest difference between this model and other diesel-electric

|                   |      |                                         |                              |      |                                                                                                                                                                                                                                                                                                                                                                                                                                                                                                                                                                                                    |                      |      |
|-------------------|------|-----------------------------------------|------------------------------|------|----------------------------------------------------------------------------------------------------------------------------------------------------------------------------------------------------------------------------------------------------------------------------------------------------------------------------------------------------------------------------------------------------------------------------------------------------------------------------------------------------------------------------------------------------------------------------------------------------|----------------------|------|
| Diesel locomotive | R6   | Miaoli Railway Heritage Exhibition Hall | Japan Hitachi Mfg. Co., Ltd. | 1960 | It was only retired after the east line was widened and completed in June 1982. It was transported to the Cultural Center of Magong, Penghu for display in September 1985. It was moved and placed in 2000. Miaoli Exhibition Hall of Railway Cultural Relics. Although this model did not enter mass production due to various reasons, Hualien Machinery Factory, with limited technology and resources at the time, built the first self-made diesel-hydraulic locomotive in the history of railways, which can be regarded as a milestone in the history of Taiwan railway vehicle technology. | 15,370 × 2875 × 3750 | 84.5 |
| Diesel locomotive | S305 | Miaoli Railway Heritage Exhibition Hall | American GM Company          | 1966 | The western main line of the Taiwan Railways began to power diesel. The diesel electric locomotives initially introduced were purchased from Hitachi, Japan in 1960. After that, the purchase of two vehicles originally under warranty was added, for a total of 12 vehicles.                                                                                                                                                                                                                                                                                                                     | 11,230 × 2667 × 3600 | 54   |

|                   |      |                                         |                     |      |                                                                                                                                                                                                                                                                                                                                                                                                                                                    |                      |    |
|-------------------|------|-----------------------------------------|---------------------|------|----------------------------------------------------------------------------------------------------------------------------------------------------------------------------------------------------------------------------------------------------------------------------------------------------------------------------------------------------------------------------------------------------------------------------------------------------|----------------------|----|
| Diesel locomotive | S405 | Miaoli Railway Heritage Exhibition Hall | American GM Company | 1970 | <p>vehicles is that the traction motor is installed on the frame and the wheels are driven by the drive shaft. At present, only the S318 car is still in use, and another two cars are displayed statically.</p> <p>In 1970, it was manufactured by GM Company of the United States. It was mainly used for the hump shunting of Qidu Marshalling Yards. At present, only No. S405 is reserved in the Railway Heritage Miaoli Exhibition Hall.</p> | 12,080 × 2970 × 3700 | 54 |
| Diesel locomotive | S316 | Sun Moon Lake                           | American GM Company | 1966 | <p>In 1966, it was manufactured by the American GM Company. There are 21 vehicles in total, mainly for shunting. The biggest difference between this model and other diesel-electric vehicles is that the traction motor is installed on the frame and the wheels are driven by the drive shaft. At present, only the S318 car is still in use, and another two cars are displayed statically.</p>                                                 | 11,230 × 2667 × 3600 | 54 |
| Diesel locomotive | S318 | Changhua Locomotive Depot               | American GM Company | 1966 | <p>In 1966, a total of 21 vehicles were manufactured by American GM Company, mainly for shunting. The biggest difference between this model and other diesel-electric vehicles is that the traction motor is installed on the frame and the wheels are driven by the drive shaft. At present, only the S318 car is still in use, and another two cars are displayed statically.</p>                                                                | 11,230 × 2667 × 3600 | 54 |
| Diesel locomotive | S201 | Kaohsiung Locomotive Depot              | American GM Company | 1960 | <p>In 1960, it was purchased from General Motors Corporation of the United States. It was the first time that Taiwan Railway purchased 12 locomotives for use as a transfer station.</p>                                                                                                                                                                                                                                                           | 12,160 × 2787 × 3665 | 65 |
| Diesel locomotive | R21  | Changhua Locomotive Depot               | American GM Company | 1959 | <p>In 1959, they used World Bank loans to purchase from the American company General</p>                                                                                                                                                                                                                                                                                                                                                           | 14,226 × 2787 × 3665 | 78 |

|                   |     |                           |                     |      |                                                                                                                                                                                                                                                                                                                                                                                                                                                                                                                                                                                                                                                                                                                                                                                                                                                                                                                                                                                                                                                                                                                                                                                                                                                                                                                                                                                                                                                                                                                |                                  |    |
|-------------------|-----|---------------------------|---------------------|------|----------------------------------------------------------------------------------------------------------------------------------------------------------------------------------------------------------------------------------------------------------------------------------------------------------------------------------------------------------------------------------------------------------------------------------------------------------------------------------------------------------------------------------------------------------------------------------------------------------------------------------------------------------------------------------------------------------------------------------------------------------------------------------------------------------------------------------------------------------------------------------------------------------------------------------------------------------------------------------------------------------------------------------------------------------------------------------------------------------------------------------------------------------------------------------------------------------------------------------------------------------------------------------------------------------------------------------------------------------------------------------------------------------------------------------------------------------------------------------------------------------------|----------------------------------|----|
| Diesel locomotive | R50 | Changhua Locomotive Depot | American GM Company | 1959 | <p>Motors. There are a total of 52 vehicles of this model. The powertrain is a single unit that can be disassembled and replaced independently. This design is also a common design criterion for future models. The R70 model is equipped with electric power control for the first time. This type of car originally used an engine. As the American company no longer produces parts, Taiwan Railways Taipei Machinery Plant researched and replaced it with a 645E engine in order to keep the vehicle running.</p> <p>In 1959, they used World Bank loans to purchase from the American company General Motors. There are a total of 52 vehicles of this model. The powertrain is a single unit that can be disassembled and replaced independently. This design is also a common design criterion for future models. The R70 model is equipped with electric power control for the first time. This type of car originally used an engine. As the American company no longer produces parts, Taiwan Railways Taipei Machinery Plant researched and replaced it with a 645E engine in order to keep the vehicle running.</p> <p>In 1959, he used a loan from the World Bank to purchase from the American company General Motors. There are a total of 52 vehicles of this model. The powertrain is a single unit that can be disassembled and replaced independently. This design is also a common design criterion for future models. The R70 model is equipped with electric power control for the</p> | $14,226 \times 2787 \times 3665$ | 78 |
|                   | R71 | Changhua Locomotive Depot | American GM Company | 1959 | <p>powertrain is a single unit that can be disassembled and replaced independently. This design is also a common design criterion for future models. The R70 model is equipped with electric power control for the</p>                                                                                                                                                                                                                                                                                                                                                                                                                                                                                                                                                                                                                                                                                                                                                                                                                                                                                                                                                                                                                                                                                                                                                                                                                                                                                         | $14,226 \times 2787 \times 3665$ | 78 |

|                          |          |                           |                           |      |                                                                                                                                                                                                                                                                                                                                                                                                                                                                                                                                                                                                                                                                                                                                                                                                                                                               |                      |      |
|--------------------------|----------|---------------------------|---------------------------|------|---------------------------------------------------------------------------------------------------------------------------------------------------------------------------------------------------------------------------------------------------------------------------------------------------------------------------------------------------------------------------------------------------------------------------------------------------------------------------------------------------------------------------------------------------------------------------------------------------------------------------------------------------------------------------------------------------------------------------------------------------------------------------------------------------------------------------------------------------------------|----------------------|------|
| Diesel locomotive        | R68      | Taipei machine factory    | American GM Company       | 1959 | <p>first time. This type of car originally used an engine. As the American company no longer produces parts, Taiwan Railways Taipei Machinery Plant researched and replaced it with a 645E engine in order to keep the vehicle running.</p> <p>In 1959, he used a loan from the World Bank to purchase from the American company General Motors. There are a total of 52 vehicles of this model. The powertrain is a single unit that can be disassembled and replaced independently. This design is also a common design criterion for future models. The R70 model is equipped with electric power control for the first time. This type of car originally used an engine. As the American company no longer produces parts, Taiwan Railways Taipei Machinery Plant researched and replaced it with a 645E engine in order to keep the vehicle running.</p> | 14,226 × 2787 × 3665 | 78   |
| Electric locomotive      | E101     | Changhua Locomotive Depot | British GEC Company       | 1976 | <p>Railway electrification was introduced. It was manufactured by British GEC Company in 1976. There are a total of 20 vehicles. The main traction equipment adopts four traction motors. This type of car has no passenger air-conditioning power supply facilities, mainly traction freight trains, and non-air-conditioned passenger cars.</p> <p>Da Quling was scrapped one after another in 2005, and only the E101 car was retained.</p>                                                                                                                                                                                                                                                                                                                                                                                                                | 15,120 × 2995 × 4003 | 72   |
| Diesel passenger railcar | 25DR2053 | Changhua Locomotive Depot | Hualien Machinery Factory | 1975 | <p>In 1985, the Hualien Machinery Factory of the Taiwan Railway Bureau widened the original east line and suspended the LDR2300 Guanghua, modified it to 1067 mm gauge. The body painting was changed to a blue base with a white line, and the</p>                                                                                                                                                                                                                                                                                                                                                                                                                                                                                                                                                                                                           | 15,600 × 2420 × 3290 | 18.4 |

car registration was changed, but the car body remained. It retains the size of the old Eastern Front, and the color of the modified body is like the color of Tinkerbell, so it is nicknamed "Tinkerbell." After the last train departed on November 4, 1996, it officially stopped and entered history. In June 1998, in conjunction with the resurrection of the steam locomotive CK101, four trailers including DR2053, DR2055, DR2056, and DR2057 were refurbished into tourist nostalgic railcars. The car is now stored in the Changhua Locomotive Depot.

In 1985, the Hualien Machinery Factory of the Taiwan Railway Bureau widened the original east line and suspended the LDR2300 Guanghua, modified it to 1067 mm gauge. The body painting was changed to a blue base with a white line, and the car registration was changed, but the car body remained. It retains the size of the old Eastern Front, and the color of the modified body is like the color of Tinkerbell, so it is nicknamed "Tinkerbell." After the last train departed on November 4, 1996, it officially stopped and entered history. In June 1998, in conjunction with the resurrection of the steam locomotive CK101, four trailers including DR2053, DR2055, DR2056, and DR2057 were refurbished into tourist nostalgic buses. The car is now stored in the Changhua Locomotive Depot.

In 1985, the Hualien Machinery Factory of the Taiwan Railway Bureau widened the original east line and suspended the LDR2300 Guanghua, modified it to 1067 mm gauge. The body

|                          |          |                           |                           |      |                                                                                                                                                                                                                                                                                                                                                                                                                                                                                                                                                                                                                                                                                                                                                                                                            |                      |      |
|--------------------------|----------|---------------------------|---------------------------|------|------------------------------------------------------------------------------------------------------------------------------------------------------------------------------------------------------------------------------------------------------------------------------------------------------------------------------------------------------------------------------------------------------------------------------------------------------------------------------------------------------------------------------------------------------------------------------------------------------------------------------------------------------------------------------------------------------------------------------------------------------------------------------------------------------------|----------------------|------|
| Diesel passenger railcar | 25DR2055 | Changhua Locomotive Depot | Hualien Machinery Factory | 1975 | car registration was changed, but the car body remained. It retains the size of the old Eastern Front, and the color of the modified body is like the color of Tinkerbell, so it is nicknamed "Tinkerbell." After the last train departed on November 4, 1996, it officially stopped and entered history. In June 1998, in conjunction with the resurrection of the steam locomotive CK101, four trailers including DR2053, DR2055, DR2056, and DR2057 were refurbished into tourist nostalgic railcars. The car is now stored in the Changhua Locomotive Depot.                                                                                                                                                                                                                                           | 15,600 × 2420 × 3290 | 18.4 |
| Diesel passenger railcar | 25DR2056 | Changhua Locomotive Depot | Hualien Machinery Factory | 1975 | In 1985, the Hualien Machinery Factory of the Taiwan Railway Bureau widened the original east line and suspended the LDR2300 Guanghua, modified it to 1067 mm gauge. The body painting was changed to a blue base with a white line, and the car registration was changed, but the car body remained. It retains the size of the old Eastern Front, and the color of the modified body is like the color of Tinkerbell, so it is nicknamed "Tinkerbell." After the last train departed on November 4, 1996, it officially stopped and entered history. In June 1998, in conjunction with the resurrection of the steam locomotive CK101, four trailers including DR2053, DR2055, DR2056, and DR2057 were refurbished into tourist nostalgic buses. The car is now stored in the Changhua Locomotive Depot. | 15,600 × 2420 × 3290 | 18.4 |

painting was changed to a blue base with a white line, and the car registration was changed, but the car body remained. It retains the size of the old Eastern Front, and the color of the modified body is like the color of Tinkerbelle, so it is nicknamed "Tinkerbelle." After the last train departed on November 4, 1996, it officially stopped and entered history. In June 1998, in conjunction with the resurrection of the steam locomotive CK101, four trailers including DR2053, DR2055, DR2056, and DR2057 were refurbished into tourist nostalgic buses. The car is now stored in the Changhua Locomotive Depot.

In 1985, the Hualien Machinery Factory of the Taiwan Railway Bureau widened the original east line and suspended the LDR2300 Guanghua, modified it to 1067 mm gauge. The body painting was changed to a blue base with a white line, and the car registration was changed, but the car body remained. It retains the size of the old Eastern Front, and the color of the modified body is like the color of Tinkerbelle, so it is nicknamed "Tinkerbelle." After the last train departed on November 4, 1996, it officially stopped and entered history. In June 1998, in conjunction with the resurrection of the steam locomotive CK101, four trailers including DR2053, DR2055, DR2056, and DR2057 were refurbished into tourist nostalgic buses. The car is now stored in the Changhua Locomotive Depot.

|                          |          |                             |                           |      |                                                                                                                                                                                                                                                                                                                                                                                                     |                      |      |
|--------------------------|----------|-----------------------------|---------------------------|------|-----------------------------------------------------------------------------------------------------------------------------------------------------------------------------------------------------------------------------------------------------------------------------------------------------------------------------------------------------------------------------------------------------|----------------------|------|
| Diesel passenger railcar | 25DR2057 | Changhua Locomotive Depot   | Hualien Machinery Factory | 1975 | of Tinkerbelle, so it is nicknamed "Tinkerbelle." After the last train departed on November 4, 1996, it officially stopped and entered history. In June 1998, in conjunction with the resurrection of the steam locomotive CK101, four trailers including DR2053, DR2055, DR2056, and DR2057 were refurbished into tourist nostalgic buses. The car is now stored in the Changhua Locomotive Depot. | 15,600 × 2420 × 3290 | 18.4 |
| Diesel passenger railcar | 25DR2060 | Taitung Railway Art Village | Hualien Machinery Factory | 1975 | In 1985, the Hualien Machinery Factory of the Taiwan Railway Bureau widened the original east line and suspended the                                                                                                                                                                                                                                                                                | 15,600 × 2420 × 3290 | 18.4 |



|                          |          |                             |                           |      |                                                                                                                                                                                                                                                                                                                                                                                                                                                                                                                                                                                                                                                                                                                                                                                                                                                                                                                                                                                                                                                                                                                                                                                                                                                                                                                                                                                                                                                                                                                                                                                         |                      |      |
|--------------------------|----------|-----------------------------|---------------------------|------|-----------------------------------------------------------------------------------------------------------------------------------------------------------------------------------------------------------------------------------------------------------------------------------------------------------------------------------------------------------------------------------------------------------------------------------------------------------------------------------------------------------------------------------------------------------------------------------------------------------------------------------------------------------------------------------------------------------------------------------------------------------------------------------------------------------------------------------------------------------------------------------------------------------------------------------------------------------------------------------------------------------------------------------------------------------------------------------------------------------------------------------------------------------------------------------------------------------------------------------------------------------------------------------------------------------------------------------------------------------------------------------------------------------------------------------------------------------------------------------------------------------------------------------------------------------------------------------------|----------------------|------|
| Diesel passenger railcar | 25DR2067 | Taitung Railway Art Village | Hualien Machinery Factory | 1975 | <p>LDR2300 Guanghua, modified it to 1067 mm gauge. The body painting was changed to a blue base with a white line, and the car registration was changed, but the car body remained. It retains the size of the old Eastern Front, and the color of the modified body is like the color of Tinkerbelle, so it is nicknamed "Tinkerbelle." After the last train departed on November 4, 1996, it officially stopped and entered history. Currently stored in Taitung Railway Culture and Art Village.</p> <p>In 1985, the Hualien Machinery Factory of the Taiwan Railway Bureau widened the original east line and suspended the LDR2300 Guanghua, modified it to 1067 mm gauge. The body painting was changed to a blue base with a white line, and the car registration was changed, but the car body remained. It retains the size of the old Eastern Front, and the color of the modified body is like the color of Tinkerbelle, so it is nicknamed "Tinkerbelle." After the last train departed on November 5, 1996, it officially stopped and entered history. Currently stored in Taitung Railway Culture and Art Village.</p> <p>In 1985, the Hualien Machinery Factory of the Taiwan Railway Bureau widened the original east line and suspended the LDR2300 Guanghua, modified it to 1067 mm gauge. The body painting was changed to a blue base with a white line, and the car registration was changed, but the car body remained. It retains the size of the old Eastern Front, and the color of the modified body is like the color of Tinkerbelle, so it is nicknamed</p> | 15,600 × 2420 × 3290 | 18.4 |
|                          |          |                             |                           |      |                                                                                                                                                                                                                                                                                                                                                                                                                                                                                                                                                                                                                                                                                                                                                                                                                                                                                                                                                                                                                                                                                                                                                                                                                                                                                                                                                                                                                                                                                                                                                                                         |                      |      |
| Diesel passenger railcar | 25DR2069 | Taitung Railway Art Village | Hualien Machinery Factory | 1975 | <p>LDR2300 Guanghua, modified it to 1067 mm gauge. The body painting was changed to a blue base with a white line, and the car registration was changed, but the car body remained. It retains the size of the old Eastern Front, and the color of the modified body is like the color of Tinkerbelle, so it is nicknamed</p>                                                                                                                                                                                                                                                                                                                                                                                                                                                                                                                                                                                                                                                                                                                                                                                                                                                                                                                                                                                                                                                                                                                                                                                                                                                           | 15,600 × 2420 × 3290 | 18.4 |
|                          |          |                             |                           |      |                                                                                                                                                                                                                                                                                                                                                                                                                                                                                                                                                                                                                                                                                                                                                                                                                                                                                                                                                                                                                                                                                                                                                                                                                                                                                                                                                                                                                                                                                                                                                                                         |                      |      |

|                          |          |                                                 |                            |      |                                                                                                                                                                                                                                                                                                                                                                                                                                                                                                                                                                                                                                                               |                                  |       |
|--------------------------|----------|-------------------------------------------------|----------------------------|------|---------------------------------------------------------------------------------------------------------------------------------------------------------------------------------------------------------------------------------------------------------------------------------------------------------------------------------------------------------------------------------------------------------------------------------------------------------------------------------------------------------------------------------------------------------------------------------------------------------------------------------------------------------------|----------------------------------|-------|
| Diesel passenger railcar | 35DR2102 | Taipei Machinery Factory (Dongxing Street Site) | Japan Ministry of Railways | 1931 | "Tinkerbelle." After the last train departed on November 6, 1996, it officially stopped and entered history. Currently stored in Taitung Railway Culture and Art Village.                                                                                                                                                                                                                                                                                                                                                                                                                                                                                     | $19,916 \times 2660 \times 3600$ | 29.22 |
|                          |          |                                                 |                            |      | The predecessor of the DR2100 diesel railcar was the Kiha100 gasoline vehicle purchased by the Japanese Ministry of Railways in 1931. Subsequent updates were made to diesel engines, which were changed to DR2100 diesel passenger cars in 1957. It is currently kept at the old site of Dongxing Street, Taipei Machinery Factory of Taiwan Railway Bureau.                                                                                                                                                                                                                                                                                                 |                                  |       |
|                          |          |                                                 |                            |      | The predecessor of DR2400 is the Kiha400 gasoline vehicle manufactured by Kawasaki, Japan. Subsequent updates were made to diesel engines, which were changed to DR2400 diesel passenger cars in 1969. It is currently kept at the old site of Dongxing Street, Taipei Machinery Factory of Taiwan Railway Bureau.                                                                                                                                                                                                                                                                                                                                            |                                  |       |
| Diesel passenger railcar | 35DR2404 | Taipei Machinery Factory (Dongxing Street Site) | Kawasaki, Japan            | 1969 | In 1966, it was built by Tokyu Vehicles of Japan, with a total of 31 vehicles (a total of 25 powered vehicles numbered DR2700, and a total of six unpowered trailers DR2750). The stainless steel car body was used on the Western Main Line under the name Guanghua, setting the record for the fastest train on the Western Main Line (up to 110 km per h). Its stainless steel car body was in sharp contrast with the black steam train at the time. After the completion of the electrification of the Western Railway in 1979, the diesel express trains were changed to run on the northern loop line and the section north of Taichung on the Western | $19,916 \times 2660 \times 3600$ | 29.22 |
|                          |          |                                                 |                            |      |                                                                                                                                                                                                                                                                                                                                                                                                                                                                                                                                                                                                                                                               |                                  |       |
| Diesel passenger railcar | 35DR2752 | Taitung Locomotive Section                      | Japan Tokyu Vehicles       | 1966 |                                                                                                                                                                                                                                                                                                                                                                                                                                                                                                                                                                                                                                                               | $20,274 \times 2885 \times 3975$ | 27.5  |

|                          |          |                           |                           |                                                                                                                                                                                                                                                                                                                                                                                                                                                                                                                                                                                                                                                                                                                                                                                                                                                                                                                                                                                                                                                                                                                                                                                                                                                                                                                                                                                                                                                                                                                                                                                |                      |      |
|--------------------------|----------|---------------------------|---------------------------|--------------------------------------------------------------------------------------------------------------------------------------------------------------------------------------------------------------------------------------------------------------------------------------------------------------------------------------------------------------------------------------------------------------------------------------------------------------------------------------------------------------------------------------------------------------------------------------------------------------------------------------------------------------------------------------------------------------------------------------------------------------------------------------------------------------------------------------------------------------------------------------------------------------------------------------------------------------------------------------------------------------------------------------------------------------------------------------------------------------------------------------------------------------------------------------------------------------------------------------------------------------------------------------------------------------------------------------------------------------------------------------------------------------------------------------------------------------------------------------------------------------------------------------------------------------------------------|----------------------|------|
| Diesel passenger railcar | 35DR2009 | Hualien Machinery Factory | Hualien Machinery Factory | 1985<br>Main Line. After that, the Taiwan Railway Bureau introduced the Ziqiang diesel combined vehicle to run on the eastern main line, and it was converted to medium and short distance diesel. Duikuai, Dhai-kuai, and Chaipu trains are active in the northern section of the Zongguan line, the middle section of the Zongguan line, the Pingtung line, the Nanhui line, and the Taitung line. At present, there are still eight vehicles in dynamic storage, running as cultural trains; the other eight vehicles in static storage. In 1985, the Hualien Machinery Factory of the Taiwan Railway Bureau widened the original east line and suspended the LDR2300 Guanghua, modified it to 1067 mm gauge. The body painting was changed to a blue base with a white line, and the car registration was changed, but the car body remained. It retains the size of the old Eastern Front, and the color of the modified body is like the color of Tinkerbelle, so it is nicknamed "Tinkerbelle." After the last train departed on November 4, 1996, it officially stopped and entered history. Currently stored in Hualien Machinery Factory. In 1985, the Hualien Machinery Factory of the Taiwan Railway Bureau widened the original eastern route and suspended the LDR2300 Guanghua, modified it to a 1067 mm gauge, changed the body painting to a blue background and a white line, and the car registration was changed to DR2000, etc. The car body still retains the size of the old Eastern Front, and the color of the modified car body is like the color of | 15,600 × 2420 × 3290 | 22.5 |
| Diesel passenger railcar | 35DR2010 | Hualien Machinery Factory | Hualien Machinery Factory | 1985<br>Main Line. After that, the Taiwan Railway Bureau introduced the Ziqiang diesel combined vehicle to run on the eastern main line, and it was converted to medium and short distance diesel. Duikuai, Dhai-kuai, and Chaipu trains are active in the northern section of the Zongguan line, the middle section of the Zongguan line, the Pingtung line, the Nanhui line, and the Taitung line. At present, there are still eight vehicles in dynamic storage, running as cultural trains; the other eight vehicles in static storage. In 1985, the Hualien Machinery Factory of the Taiwan Railway Bureau widened the original east line and suspended the LDR2300 Guanghua, modified it to 1067 mm gauge. The body painting was changed to a blue base with a white line, and the car registration was changed, but the car body remained. It retains the size of the old Eastern Front, and the color of the modified body is like the color of Tinkerbelle, so it is nicknamed "Tinkerbelle." After the last train departed on November 4, 1996, it officially stopped and entered history. Currently stored in Hualien Machinery Factory. In 1985, the Hualien Machinery Factory of the Taiwan Railway Bureau widened the original eastern route and suspended the LDR2300 Guanghua, modified it to a 1067 mm gauge, changed the body painting to a blue background and a white line, and the car registration was changed to DR2000, etc. The car body still retains the size of the old Eastern Front, and the color of the modified car body is like the color of | 15,600 × 2420 × 3290 | 22.5 |

|                                       |          |                        |                                                  |      |                                                                                                                                                                                                                                                                                                                                                                                                                                                                                                                                                                                                                                                                                                                                                                                                                                                                                                                                                                                                                                                                                                                                                                                                                                                                                                                                                                                                                                                                                                                                                   |                      |
|---------------------------------------|----------|------------------------|--------------------------------------------------|------|---------------------------------------------------------------------------------------------------------------------------------------------------------------------------------------------------------------------------------------------------------------------------------------------------------------------------------------------------------------------------------------------------------------------------------------------------------------------------------------------------------------------------------------------------------------------------------------------------------------------------------------------------------------------------------------------------------------------------------------------------------------------------------------------------------------------------------------------------------------------------------------------------------------------------------------------------------------------------------------------------------------------------------------------------------------------------------------------------------------------------------------------------------------------------------------------------------------------------------------------------------------------------------------------------------------------------------------------------------------------------------------------------------------------------------------------------------------------------------------------------------------------------------------------------|----------------------|
| Diesel passenger railcar              | 35DR2652 | Taipei machine factory | Japan Tokyu Vehicles                             | 1955 | <p>Ding Dong, so it is nicknamed "Little Ding Dong". After the last train departed on November 4, 1996, it officially stopped and entered history. In June 1987, in conjunction with the resurrection of the steam locomotive CK101, four trailers including DR2053, DR2055, DR2056, and DR2057 were refurbished into tourist nostalgic passenger cars (the four cars are now stored in the Hualien Locomotive Depot of the Taiwan Railway Administration). In addition, three vehicles including DR2060, DR2067 and DR2069 are stored in Taitung Railway Cultural Art Village, and two vehicles including DR2009 and DR2010 are stored in Hualien Machinery Factory.</p> <p>In 1955, it was manufactured by Tokyu Vehicles, a total of eight vehicles, one of which was assembled and imported by Tokyu Vehicles, and the remaining seven were assembled by Taipei Machine Works. The operation started in February 1956. It takes about 2 h and 25 min from Taipei to Taichung, and about 5 h and 30 min from Taipei to Kaohsiung, greatly shortening the travel time. In 1957, DR2600 and DR2650 were introduced to Tokyu Vehicles. The basic design was the same as the DR2500, with a total of 14 vehicles. At present, there is still one vehicle such as DR2652, which is kept in the Taipei Machine Factory of the Taiwan Railway Bureau.</p> <p>A steel-body diesel passenger car for light railways produced by Taiwan Railway Bureau Taipei Machinery Plant/Hualien Machinery Plant in 1958. It has 50 seats and is the main force</p> | 19,916 × 2784 × 3600 |
| Narrow gauge diesel passenger railcar | LDR2201  | Taipei Main Station    | Taipei machine factory/Hualien Machinery Factory | 1958 |                                                                                                                                                                                                                                                                                                                                                                                                                                                                                                                                                                                                                                                                                                                                                                                                                                                                                                                                                                                                                                                                                                                                                                                                                                                                                                                                                                                                                                                                                                                                                   | 19,916 × 2600 × 3600 |

|                                       |         |                          |                                                  |      |                                                                                                                                                                                                                                                                                                                                                                                                                                                                                                                                                                                              |                      |       |
|---------------------------------------|---------|--------------------------|--------------------------------------------------|------|----------------------------------------------------------------------------------------------------------------------------------------------------------------------------------------------------------------------------------------------------------------------------------------------------------------------------------------------------------------------------------------------------------------------------------------------------------------------------------------------------------------------------------------------------------------------------------------------|----------------------|-------|
|                                       |         |                          |                                                  |      | for passenger transportation on the Huadong Line of Taiwan Railways. It is used for the gauge widening project of the Eastern Main Line of Taiwan Railways. All decommissioned after completion. It is currently located in the East Square of Taipei Main Station, Taipei City.                                                                                                                                                                                                                                                                                                             |                      |       |
| Narrow gauge diesel passenger railcar | LDR2204 | Hualien Locomotive Depot | Taipei machine factory/Hualien Machinery Factory | 1958 | A steel-body diesel passenger car for light railways produced by Taiwan Railway Bureau Taipei Machinery Plant/Hualien Machinery Plant in 1958. It has 50 seats and is the main force for passenger transportation on the Huadong Line of Taiwan Railways. It is used for the gauge widening project of the Eastern Main Line of Taiwan Railways. All decommissioned after completion. It is currently placed in Hualien Locomotive Depot.                                                                                                                                                    | 19,916 × 2600 × 3600 |       |
| Narrow gauge diesel passenger railcar | LDR2307 | Hualien Locomotive Depot | Taipei machine factory/Hualien Machinery Factory | 1968 | The original car number was LTP1801. In 1958, the Taipei Machinery Factory produced aluminum shell panels, and the Hualien Machinery Factory assembled the body and power pack parts to become a diesel powered car. In July 1971, it changed its status to LDR2307, which was the fastest running car on the Eastern Line at that time. After the expansion of the Huadong Railway was completed in June 1982, it was a success. Due to its simplicity and preservation value, it was refurbished by Hualien Machinery Factory in 2000 and is currently parked in Hualien Locomotive Depot. | 19,916 × 2600 × 3600 |       |
| Ziqiang Electric Combined railcar     | ET115   | Taipei machine factory   | British GEC Company                              | 1978 | During the electrification of the railway in 1978, the Ziqiang electric multiplexed car made in the UK was first introduced, with a total of 65 vehicles in 13                                                                                                                                                                                                                                                                                                                                                                                                                               | 20,090 × 2802 × 4170 | 33.69 |

formations (five independent small formations were used, and the formation type was EP-EM-ET-ET-ED configuration). Each group of this type of trolley can be driven at the front and rear ends, so when arriving at the terminal, there is no need to turn back and shunt, which is very convenient. The electric and electronic control system adopted was a major innovation at the time, especially with the conditions for speed control, allowing drivers to feel convenient and easy to drive. The Ziqiang through train can reach Taipei=Taiwan within 2 h, and Taipei=Kaohsiung can be reached within 4 h. In the Hsinchu Touqian River accident on March 8, 1982, a group of electric multiple railcars fell into the stream due to the ED trailer. They were severely damaged and could not be repaired. They were scrapped in 1983. Later, they were driven by the power supply due to application requirements. EP112 was changed to driving trailer EPD112. At present, because it has reached the operating life, it is gradually discontinued and scrapped, leaving 15 cars in the register.

In 1969, 12 vehicles were manufactured by Tokyu Corporation of Japan, and the Tangrong Iron Factory in Taiwan updated 6 railvans, totaling 18 railvans, exclusively for carrying luggage and cargo. It is currently stored at the Kaohsiung Machinery Plant of Taiwan Railway Administration.

In 1969, 12 vehicles were manufactured by Tokyu Corporation of Japan, and the Tangrong Iron Factory in Taiwan updated

|                 |           |                             |                         |      |                                                                                                                                                                         |                      |      |
|-----------------|-----------|-----------------------------|-------------------------|------|-------------------------------------------------------------------------------------------------------------------------------------------------------------------------|----------------------|------|
| Luggage railvan | 40BK32406 | Kaohsiung Machinery Factory | Japan Tokyu Corporation | 1969 | 6 railvans, totaling 18 railvans, exclusively for carrying luggage and cargo. It is currently stored at the Kaohsiung Machinery Plant of Taiwan Railway Administration. | 20,000 × 2865 × 3953 | 29.8 |
| Luggage railvan | 40BK32409 | Kaohsiung Machinery Factory | Japan Tokyu Corporation | 1969 | In 1969, 12 vehicles were manufactured by Tokyu Corporation of Japan, and the Tangrong Iron Factory in Taiwan updated                                                   | 20,000 × 2865 × 3953 | 29.8 |

|                          |            |                                |                                                    |      |                                                                                                                                                                                                                                                                                                                                                                                                                                                                                                             |                                  |       |
|--------------------------|------------|--------------------------------|----------------------------------------------------|------|-------------------------------------------------------------------------------------------------------------------------------------------------------------------------------------------------------------------------------------------------------------------------------------------------------------------------------------------------------------------------------------------------------------------------------------------------------------------------------------------------------------|----------------------------------|-------|
| Luggage railvan          | 35BK32353  | Kaohsiung Machinery Factory    | Taipei machine factory                             | 1967 | 6 railvans, totaling 18 railvans, exclusively for carrying luggage and cargo. It is currently stored at the Kaohsiung Machinery Plant of Taiwan Railway Administration.<br>In 1967, it was transformed by the 35EGK32300 power locomotive manufactured by the Taiwan Railway Bureau Taipei Machine Works. It is specially used for carrying luggage and cargo. Currently, only 35BK32353 remains and it is stored in the Taiwan Railway Bureau Kaohsiung Machine Factory.                                   | $17,000 \times 2865 \times 3953$ | 26.7  |
| Luggage railvan          | 35BK32952  | Kaohsiung Port                 | Japan                                              | 1970 | Manufactured in Japan in 1989, it was originally a 45PBK32900 type. It was updated to a 35BK92900 luggage trolley in Republic of China. Currently preserved in Kaohsiung Dagou Railway Cultural Park.<br>It was originally a passenger railcar No. 35SPK32389. When the West Line was electrified in 1978, it was transformed into an inspection car for electric power section tram line surveys. The length of the car is only 17 m. It is equipped with a TR32 bogie. This is the only car of this type. | $20,000 \times 2865 \times 3953$ | 27.5  |
| Checking Engineering car | 30EOB32389 | Kaohsiung Machinery Factory    |                                                    | 1978 | The original 30SP32375 was transformed into a camper car for public works construction in 1995. The car is only 17 m long and is equipped with a TR32 bogie. This model is the only car left.<br>The aluminum body was assembled in 1978 by Taiwan Aluminum Corporation at Taipei Machine Works. The original car was a caravan No. 17C17001. In 1990, it was transformed into an engineering camper for public works. The only car of this type remains.                                                   | $20,000 \times 2865 \times 3953$ | 33.96 |
| Engineering car          | 30ES32375  | Public Works Maintenance Corps |                                                    | 1995 |                                                                                                                                                                                                                                                                                                                                                                                                                                                                                                             | $17,000 \times 2865 \times 3953$ | 27    |
| Engineering car          | 10ES17001  | Public Works Maintenance Corps | Taiwan Aluminum Corporation/Taipei machine factory | 1978 |                                                                                                                                                                                                                                                                                                                                                                                                                                                                                                             | $7850 \times 2762 \times 3721$   | 8.6   |

|                                        |        |                                   |                                    |      |                                                                                                                                                                                                                                                                                                                    |                         |       |
|----------------------------------------|--------|-----------------------------------|------------------------------------|------|--------------------------------------------------------------------------------------------------------------------------------------------------------------------------------------------------------------------------------------------------------------------------------------------------------------------|-------------------------|-------|
| Engineer-<br>ing car                   | 10EW11 | Sun Moon<br>Lake                  | Kaohsiung<br>Machinery<br>Factory  | 1931 | The original train was a 10W11 water tanker (made in 1931), which was rebuilt in 1979 for a special power supply engineering vehicle. This model is the only one remaining.                                                                                                                                        | 6286 × 2100 ×<br>2863   | 7.89  |
| Engineer-<br>ing car                   | 15EF19 | Kaohsiung<br>Port                 | Japan                              | 1911 | The prototype was a 15F10 flat car introduced by Japan in 1911. It was transformed into a special electric engineering car at Kaohsiung Machinery Factory in 1980. This car is old, and the only car of this type is left.                                                                                         | 8266 × 2242 ×<br>2134   | 8.05  |
| Large<br>cargo En-<br>gineering<br>car | 30D11  | Kaohsiung<br>Machinery<br>Factory | Taipei ma-<br>chine factory        | 1928 | In 1928, it was built by the Taipei Machinery Factory for the first time for transporting heavy and large cargo. The bogie was TR75 and wheel-type wheels.                                                                                                                                                         | 12,068 × 2505 ×<br>2023 | 17.28 |
| Large<br>cargo En-<br>gineering<br>car | 30D13  | Kaohsiung<br>Machinery<br>Factory | Taipei ma-<br>chine factory        | 1935 | The truck was manufactured by Taipei Machinery Works in 1935 for transporting heavy and heavy goods. The bogie was originally TR75, wheel-type wheels, but was changed to TR82-type, integrated wheels in 1982.                                                                                                    | 12,068 × 2505 ×<br>2023 | 17.28 |
| Large<br>cargo En-<br>gineering<br>car | 50D11  | Kaohsiung<br>Machinery<br>Factory | Taiwan Ma-<br>chinery Com-<br>pany | 1931 | Manufactured by Taiwan Machinery Company in 1931, specially designed for carrying large cargo. The original 2-2 axle compound bogie was used. It was replaced with 30D111.30D112 four-axle type when it was fully repaired in 1988. It was the longest freight car of Taiwan Railway. Only iron remains.           | 21,290 × 2300 ×<br>1580 | 39.6  |
| Oil tank<br>railvan                    | 20L757 | Hsinchu Lo-<br>comotive<br>Depot  | Taipei ma-<br>chine factory        | 1961 | It was manufactured by Taipei Machinery Works in 1961. In 1966 there was a traffic accident at Tanwen Station, in which it was overturned and hurt. After the frame was updated, it continued to be used for oil transportation. It is currently statically stored in Hsinchu Locomotive Depot for diesel storage. | 9142 × 2250 ×<br>3754   | 13.9  |



|                              |          |                                    |                                      |      |                                                                                                                                                                                                                                                                             |                                  |       |
|------------------------------|----------|------------------------------------|--------------------------------------|------|-----------------------------------------------------------------------------------------------------------------------------------------------------------------------------------------------------------------------------------------------------------------------------|----------------------------------|-------|
| Oil tank railvan             | 30L853   | Kaohsiung Machinery Factory        | Taipei machine factory               | 1966 | Established in 1966, exclusively for carrying oil.                                                                                                                                                                                                                          | $13,400 \times 2420 \times 3896$ | 18    |
| Alternative platform railvan | 35GF6061 | Sun Moon Lake                      | Japan Hitachi/Taipei machine factory | 1958 | Manufactured in 1958, it is one of the three-type substitute flat cars of Taiwan Railways. A total of 27 railvans of this type were transformed from the original 35G6000 gondola from 1981 to 1987, and they have been scrapped since 1995. Only this type of car remains. | $14,430 \times 2890 \times 1100$ | 18.64 |
| Platform railvan             | 35F20133 | Sun Moon Lake                      | Tang Rong Company                    | 1975 | In 1975, Tang Rong Company manufactured 180 vehicles, which were the main vehicle types for transporting military vehicles and containers.                                                                                                                                  | $14,430 \times 2890 \times 1100$ | 18.64 |
| Platform railvan             | 35F20106 | Kaohsiung Port                     | Tang Rong Company                    | 1975 | In 1975, Tang Rong Company manufactured a total of 181 vehicles, which were the main vehicle types for transporting military vehicles and containers in that era.                                                                                                           | $14,430 \times 2890 \times 1100$ | 18.64 |
| Platform railvan             | 50F108   | Department of Defense Army Academy | Japan Iino Heavy Industries          | 1962 | Manufactured in 1962, it was the main vehicle type for transporting military vehicles and containers at that time.                                                                                                                                                          | $15,500 \times 2890 \times 1200$ | 26.26 |
| Platform railvan             | 35F20146 | Department of Defense Army Academy | Tang Rong Company                    | 1975 | In 1975, Tang Rong Company manufactured a total of 181 vehicles, which were the main vehicle types for transporting military vehicles and containers in that era.                                                                                                           | $14,430 \times 2890 \times 1100$ | 18.64 |
| Platform railvan             | 35F20003 | Department of Defense Army Academy | Tang Rong Company                    | 1975 | In 1975, Tang Rong Company manufactured a total of 181 vehicles, which were the main vehicle types for transporting military vehicles and containers in that era.                                                                                                           | $14,430 \times 2890 \times 1100$ | 18.64 |
| Caravan railvan              | 35C21305 | Department of Defense Army Academy | Tang Rong Company                    | 1971 | Manufactured in 1971, it was the main vehicle type for transporting military vehicles and containers in that era.                                                                                                                                                           | $14,080 \times 2874 \times 3607$ | 18.48 |
| Caravan railvan              | 25C10008 | Kaohsiung Machinery Factory        |                                      | 1939 | In 1939, the first batch of newly built wooden roofs, floor panels, and steel body rivet caravans were made by Taiwan Railways. There was a serious shortage of passenger cars in 1960 and 1970. This model was                                                             | $13,950 \times 2750 \times 3840$ | 18.1  |

|                 |          |                             |                                                                                                                                                                                                                                                                                                                                                                                                                                                                                                                           |                      |      |  |
|-----------------|----------|-----------------------------|---------------------------------------------------------------------------------------------------------------------------------------------------------------------------------------------------------------------------------------------------------------------------------------------------------------------------------------------------------------------------------------------------------------------------------------------------------------------------------------------------------------------------|----------------------|------|--|
|                 |          |                             | equipped with simple seats, windows and lighting equipment and used as a substitute passenger car. It was replaced in 1978. Equipped with bogies (TR76 changed to TR204), using RCT bearings and integrated wheels; it is a representative vehicle type in the era of domestic economic take-off.                                                                                                                                                                                                                         |                      |      |  |
| Caravan railvan | 25C10077 | Kaohsiung Machinery Factory | 1939<br>In 1939, the first batch of newly built wooden roofs, floor panels, and steel body rivet caravans were made by Taiwan Railways. There was a serious shortage of passenger cars in 1960 and 1970. This model was equipped with simple seats, windows and lighting equipment and used as a substitute passenger car. It was replaced in 1978. Equipped with bogies (TR76 changed to TR204), using RCT bearings and integrated wheels; it is a representative vehicle type in the era of domestic economic take-off. | 13,950 × 2750 × 3840 | 18.1 |  |
| Caravan railvan | 25C10056 | Sun Moon Lake               | 1939<br>In 1939, the first batch of newly built wooden roofs, floor panels, and steel body rivet caravans were made by Taiwan Railways. There was a serious shortage of passenger cars in 1960 and 1970. This model was equipped with simple seats, windows and lighting equipment and used as a substitute passenger car. It was replaced in 1978. Equipped with bogies (TR76 changed to TR204), using RCT bearings and integrated wheels; it is a representative vehicle type in the era of domestic economic take-off. | 13,950 × 2750 × 3840 | 18.1 |  |
| Caravan railvan | 10C1216  | Sun Moon Lake               | 1920<br>The wooden two-axle caravan in 1920 had no ram-cylinder equipment, only two brake shoes on one axle, and ram-machine equipment. The corner                                                                                                                                                                                                                                                                                                                                                                        | 7850 × 2762 × 3721   | 9.9  |  |

|                              |          |                        |                                                    |      |                                                                                                                                                                                                                                                                                                                                                                                                                                                                                                                                                                                                                                                                                                                                                                                                                                                                                                                                                                                                                                                          |                      |       |
|------------------------------|----------|------------------------|----------------------------------------------------|------|----------------------------------------------------------------------------------------------------------------------------------------------------------------------------------------------------------------------------------------------------------------------------------------------------------------------------------------------------------------------------------------------------------------------------------------------------------------------------------------------------------------------------------------------------------------------------------------------------------------------------------------------------------------------------------------------------------------------------------------------------------------------------------------------------------------------------------------------------------------------------------------------------------------------------------------------------------------------------------------------------------------------------------------------------------|----------------------|-------|
| Refrigerated truck (railvan) | 10R104   | Sun Moon Lake          |                                                    | 1928 | posts were angle irons, so this is the only car left.<br>The wooden two-axle refrigerated truck in 1928 has no squeeze cylinder equipment, one axle has only two brake shoes, and has squeeze machine equipment, the corner posts are made of wood, and the compartment is equipped with heat insulation equipment. This is the only car left.<br>In 1970, 50 vehicles were manufactured by the Japan Automobile Association. There are six ventilation holes on the roof and multiple vents on both sides of the upper part of the car. Since 1996, it has been scrapped one after another, and one car is currently retained. Manufactured by Kaohsiung Machinery Factory in 1967, it was designed to meet the needs of transporting chickens, ducks and other small domestic animals. The wooden body and axles are basically 12-ton long axles, and the speedometer is KC180; this is the only car left.<br>In 1967, 100 vehicles were manufactured in Japan. They belonged to two-axle double-spring cranes, and were the first-generation caboose. | 8000 × 2785 × 3740   |       |
| Ventilation railvan          | 15V2016  | Sun Moon Lake          | Japan Automobile Association                       | 1970 | and multiple vents on both sides of the upper part of the car. Since 1996, it has been scrapped one after another, and one car is currently retained. Manufactured by Kaohsiung Machinery Factory in 1967, it was designed to meet the needs of transporting chickens, ducks and other small domestic animals. The wooden body and axles are basically 12-ton long axles, and the speedometer is KC180; this is the only car left.<br>In 1967, 100 vehicles were manufactured in Japan. They belonged to two-axle double-spring cranes, and were the first-generation caboose.                                                                                                                                                                                                                                                                                                                                                                                                                                                                           | 7780 × 2480 × 3880   | 10.91 |
| Livestock cart (railvan)     | 10K524   | Sun Moon Lake          | Kaohsiung Machinery Factory                        | 1967 | and other small domestic animals. The wooden body and axles are basically 12-ton long axles, and the speedometer is KC180; this is the only car left.<br>In 1967, 100 vehicles were manufactured in Japan. They belonged to two-axle double-spring cranes, and were the first-generation caboose.                                                                                                                                                                                                                                                                                                                                                                                                                                                                                                                                                                                                                                                                                                                                                        | 7850 × 2637 × 3722   | 9.35  |
| Caboose railvan              | 3CK1573  | Sun Moon Lake          | Japan                                              | 1967 | It was manufactured by Tang Rong Company in 1982, with a total of 26 vehicles, supplied for train caboose.                                                                                                                                                                                                                                                                                                                                                                                                                                                                                                                                                                                                                                                                                                                                                                                                                                                                                                                                               | 7850 × 2600 × 3902   | 10.5  |
| Caboose railvan              | 3CK2109  | Kaohsiung Port         | Tang Rong Company                                  | 1982 | A total of 145 vehicles were manufactured in Japan in 1969, which were the main vehicle types for the transportation of general goods in that era.                                                                                                                                                                                                                                                                                                                                                                                                                                                                                                                                                                                                                                                                                                                                                                                                                                                                                                       | 8580 × 2640 × 3650   | 12.4  |
| Gondola railvan              | 35G20060 | Kaohsiung Port         | Japan                                              | 1969 | Molasses carts, manufactured by the Hualien Port Repair Factory (the predecessor of Hualien Machinery Factory) of the Japanese Ministry of Railways in 1945, travel on the Eastern                                                                                                                                                                                                                                                                                                                                                                                                                                                                                                                                                                                                                                                                                                                                                                                                                                                                       | 14,316 × 2809 × 2753 | 17.48 |
| Narrow gauge molasses carts  | LFT7602  | Hualien Railway Museum | Japan Railway Ministry Hualien Port Repair Factory | 1945 |                                                                                                                                                                                                                                                                                                                                                                                                                                                                                                                                                                                                                                                                                                                                                                                                                                                                                                                                                                                                                                                          | 5830 × 2150 × 2850   |       |

|                            |          |                                         |                          |                                                                                                                                                                                                                                                                                                                                                                                                                                                                                                                                                                                                                                                                                                                                                                                                                                                                                                                                                                                                                                                                                                                                                                                                                                                                                                                                                                                                                                                                                                                          |                      |
|----------------------------|----------|-----------------------------------------|--------------------------|--------------------------------------------------------------------------------------------------------------------------------------------------------------------------------------------------------------------------------------------------------------------------------------------------------------------------------------------------------------------------------------------------------------------------------------------------------------------------------------------------------------------------------------------------------------------------------------------------------------------------------------------------------------------------------------------------------------------------------------------------------------------------------------------------------------------------------------------------------------------------------------------------------------------------------------------------------------------------------------------------------------------------------------------------------------------------------------------------------------------------------------------------------------------------------------------------------------------------------------------------------------------------------------------------------------------------------------------------------------------------------------------------------------------------------------------------------------------------------------------------------------------------|----------------------|
|                            |          |                                         |                          | <p>Main Line. Its characteristic is to transport molasses in sugar factories. As the only remaining narrow-gauge molasses car, in June 1982, after the expansion of the Huadong line was completed, it was successful. Due to its simple shape, it has preservation value. It was designated as a railway cultural relic and was refurbished by the Hualien Machinery Factory of the Bureau's Office of Maintenance in 2000. It is now located in the Hualien Railway Heritage Museum.</p> <p>The flat vehicle was manufactured by Taiwan Machinery Company in 1970, and the bogie was manufactured by Japan's Sumitomo Steel Co., Ltd. At that time, because Hualien produced wood, large logs had to rely on rail transportation. It was a model designed for the purpose of carrying logs in response to business needs. Later, it was also used to carry military vehicles or large items. After the east line was widened in June 1982, it was successfully retired. In December 1999, it was renovated by the Hualien Machinery Factory of the Taiwan Railway Administration. It is now located in the Hualien Railway Museum. Manufactured by Japanese vehicles in the 2nd year of the Republic of China, the main function of this type of vehicle is to transport timber or long-shaped goods. In order to facilitate the train's turning, a rotatable bracket is set above the vehicle platform, which can automatically deflect when the train is turning to prevent the growing wood from preventing the</p> |                      |
| Narrow gauge flat railvan  | LCFC9706 | Hualien Railway Museum                  | Taiwan Machinery Company | 1970                                                                                                                                                                                                                                                                                                                                                                                                                                                                                                                                                                                                                                                                                                                                                                                                                                                                                                                                                                                                                                                                                                                                                                                                                                                                                                                                                                                                                                                                                                                     | 11,300 × 2600 × 1800 |
| Alishan Cargo Flat railvan | 15F6006  | Miaoli Railway Heritage Exhibition Hall | Japanese vehicles        | 1913                                                                                                                                                                                                                                                                                                                                                                                                                                                                                                                                                                                                                                                                                                                                                                                                                                                                                                                                                                                                                                                                                                                                                                                                                                                                                                                                                                                                                                                                                                                     | 9000 × 2300 × 1800   |

|                                           |         |                        |                                                    |      |                                                                                                                                                                                                                                                                                                                                                                                                                                                                                                                                                                                                                                                                                     |                    |
|-------------------------------------------|---------|------------------------|----------------------------------------------------|------|-------------------------------------------------------------------------------------------------------------------------------------------------------------------------------------------------------------------------------------------------------------------------------------------------------------------------------------------------------------------------------------------------------------------------------------------------------------------------------------------------------------------------------------------------------------------------------------------------------------------------------------------------------------------------------------|--------------------|
| Narrow gauge steel body railvan           | LCC5801 | Hualien Railway Museum | Japan Railway Ministry Hualien Port Repair Factory | 1923 | <p>train from running. It was disabled in 1973. It is now placed in the Miaoli Exhibition Hall of Railway Cultural Relics.</p> <p>The steel-body caravan was manufactured by the Hualien Port Repair Factory (the predecessor of Hualien Machinery Factory) of the Japanese Ministry of Railways in 1923. It drove on the eastern trunk line. After the expansion of the Huadong Line in June 1982, it was a success. Due to its simple shape, it has preservation value. It was designated as a railway cultural relic and was refurbished by the Hualien Machinery Factory of the Bureau's Office of Maintenance in 2000. The Hualien Railway Heritage Museum is now located.</p> | 7010 × 2749 × 2134 |
| Narrow gauge steel-body gondola (railvan) | LOC7170 | Hualien Railway Museum |                                                    | 1969 | <p>The steel-body gondola drove on the Eastern Main Line in 1969. After the expansion of the Huadong Line in June 1982, it was successful. Due to its simple shape, it has preservation value. Designated as a railway cultural relic, it was refurbished by the Hualien Machinery Factory of the Bureau's Office of Maintenance in 2001. It is not located in the Hualien Railway Heritage Museum.</p>                                                                                                                                                                                                                                                                             | 5110 × 2250 × 1660 |
| Narrow gauge wooden caravan (railvan)     | LCC5006 | Hualien Railway Museum | Railway Bureau Hualien Machinery Factory           | 1963 | <p>The wooden caravan was manufactured by the Hualien Machinery Factory of the Railway Bureau in 1963 and traveled on the eastern trunk line to transport Hualien, Taitung agricultural and fish products. After the expansion of the Huadong Line in June 1982, the Huadong Line retreated. Due to its simple shape and wooden carriage, it is of great preservation value. In 2000, it was refurbished by the Kaohsiung Machinery Factory of the Railway</p>                                                                                                                                                                                                                      | 4880 × 1920 × 2720 |

|                                       |                 |                                         |                                                    |      |                                                                                                                                                                                                                                                                                                                                                                                                                                                                                                          |                      |    |
|---------------------------------------|-----------------|-----------------------------------------|----------------------------------------------------|------|----------------------------------------------------------------------------------------------------------------------------------------------------------------------------------------------------------------------------------------------------------------------------------------------------------------------------------------------------------------------------------------------------------------------------------------------------------------------------------------------------------|----------------------|----|
| Narrow gauge wooden gondola (railvan) | LOC7363         | Hualien Railway Museum                  | Japan Railway Ministry Hualien Port Repair Factory | 1929 | Administration and placed in the Hualien Railway Heritage Museum.<br>The wooden gondola was manufactured in 1929 by the Hualien Port Repair Factory (the predecessor of Hualien Machinery Factory) of the Japanese Ministry of Railways. Due to its simple shape, it has preservation value. It was designated as a railway cultural relic and was refurbished by the Hualien Machinery Factory of the Bureau's Office of Maintenance in 2000. It is now located in the Hualien Railway Heritage Museum. | 5868 × 2286 × 1368   |    |
| Narrow gauge wooden caravan (railvan) | LCC5521         | Hualien Railway Museum                  | Railway Bureau Hualien Machinery Factory           | 1929 | The wooden caravan was manufactured by the Hualien Machinery Factory of the Taiwan Railway Bureau in 1929. It drove on the Eastern Main Line. After the expansion of the Huadong Line in June 1982, it was successful. Due to its simple shape, it has preservation value. It was designated as a railway cultural relic and was refurbished by the Hualien Machinery Factory of the Bureau's Office of Maintenance in 2000. It is now located in the Hualien Railway Heritage Museum.                   | 5870 × 2380 × 2690   |    |
| Ballast preparation engineering car   | Ballast vehicle | Miaoli Railway Heritage Exhibition Hall | Austria PLASER Company                             | 1992 | The PBR201 ballast preparation vehicle has a length of 9.96 m, a width of 2.78 m, a height of 3.2 m, a weight of 14 tons, and a traveling speed of 55 km per h. Its main function is to be responsible for the preparation of ballast along the railway. The service life is 8 years. In 2000, it was scrapped at the end of the age and was displayed statically.                                                                                                                                       | 99,600 × 2780 × 3200 | 14 |
| Ballast preparation engineering car   | Ramming vehicle | Miaoli Railway Heritage Exhibition Hall | Austria PLASER Company                             | 1992 | The PBC800 ballast ramming vehicle has a length of 6.4 m, a width of 2.7 m, a height of 3.07 m, a weight of 14 tons, and a traveling speed of 55 km per h.                                                                                                                                                                                                                                                                                                                                               | 64,000 × 2700 × 3070 | 14 |

Its main function is to be responsible for the ramming of ballast along the railway. The service life is 8 years. In 2000, it was scrapped at the end of the age and was displayed statically.

**Table S2.** The ranked score of evaluated variables of each train in the objects database.

| No | Name                                         | Type      | Year | Length (m) | Width (m) | Height (m) | $\lambda_{\text{sort}}$ | $\lambda_{\text{Rarity}}$ | $\lambda_{\text{Story}}$ |
|----|----------------------------------------------|-----------|------|------------|-----------|------------|-------------------------|---------------------------|--------------------------|
| 1  | Float railcar                                | 25SA4101  | 1912 | 16.4       | 2.706     | 3.619      | 8                       | 10                        | 10                       |
| 2  | Float railcar                                | 20SA4102  | 1904 | 13.988     | 2.616     | 3.467      | 8                       | 10                        | 10                       |
| 3  | Float railcar                                | 35SA32820 | 1967 | 20         | 2.885     | 3.8        | 8                       | 10                        | 10                       |
| 4  | Living room railcar                          | 35PC32701 | 1971 | 20         | 2.885     | 3.953      | 8                       | 10                        | 8                        |
| 5  | Second class passenger railcar               | 35SP32426 | 1966 | 20         | 2.865     | 3.953      | 8                       | 9                         | 8                        |
| 6  | Wooden passenger railcar                     | 25TPK2053 | 1921 | 16.544     | 2.744     | 3.75       | 8                       | 9                         | 8                        |
| 7  | Wooden passenger railcar                     | 30SPK2502 | 1953 | 17.262     | 2.9       | 3.78       | 8                       | 9                         | 8                        |
| 8  | Narrow gauge passenger carriage              | LTPB1813  | 1970 | 11         | 2.3       | 3.2        | 8                       | 9                         | 8                        |
| 9  | Alishan passenger railcar                    | SPC2      | 1971 | 9          | 2         | 1.5        | 8                       | 9                         | 8                        |
| 10 | Narrow gauge wooden sleeper railcar          | LTPB1375  | 1943 | 10.364     | 2.229     | 3.166      | 8                       | 10                        | 8                        |
| 11 | Narrow gauge wooden sleeper railcar          | LTPS1102  | 1930 | 10.583     | 2.394     | 3.229      | 8                       | 10                        | 8                        |
| 12 | Taiwan Sugar Official Patrol engineering car | 254       | 1941 | 4.665      | 1.66      | 2.19       | 4                       | 10                        | 10                       |
| 13 | Steam locomotive                             | CK101     | 1917 | 11.404     | 2.616     | 3.658      | 10                      | 10                        | 10                       |
| 14 | Steam locomotive                             | CK124     | 1936 | 11.35      | 3.936     | 3.9        | 10                      | 10                        | 8                        |
| 15 | Steam locomotive                             | DT668     | 1940 | 19.73      | 2.89      | 3.98       | 10                      | 10                        | 10                       |
| 16 | Steam locomotive                             | CT273     | 1943 | 20.28      | 2.936     | 3.945      | 10                      | 10                        | 10                       |
| 17 | Steam locomotive                             | CT152     | 1919 | 16.775     | 2.616     | 3.885      | 10                      | 10                        | 8                        |
| 18 | Steam locomotive                             | DT561     | 1919 | 10.306     | 2.591     | 3.747      | 10                      | 10                        | 8                        |
| 19 | Narrow gauge steam locomotive                | LDK59     | 1930 | 7.422      | 2.261     | 3.042      | 10                      | 10                        | 8                        |
| 20 | Narrow gauge steam locomotive                | LDK58     | 1923 | 7.217      | 2.286     | 3.1        | 10                      | 10                        | 8                        |
| 21 | Narrow gauge steam locomotive                | LDT103    | 1942 | 14.346     | 2.235     | 3.2        | 10                      | 10                        | 10                       |
| 22 | Steam locomotive Alishan                     | 28        | 1913 | 9.87       | 2         | 3.02       | 10                      | 9                         | 10                       |
| 23 | Taiwan Sugar Steam Locomotive                | 331       | 1935 | 5.8        | 1.91      | 3.37       | 10                      | 9                         | 10                       |
| 24 | Alishan diesel locomotive                    | 11403 – 1 | 1953 | 9.25       | 1.955     | 3.1        | 10                      | 8                         | 8                        |
| 25 | Alishan diesel locomotive                    | 11403 – 5 | 1955 | 9.5        | 2.05      | 3.02       | 10                      | 8                         | 8                        |
| 26 | Narrow gauge diesel-hydraulic locomotive     | DH210     | 1969 | 11.8       | 2.45      | 3.6        | 10                      | 8                         | 8                        |



|    |                                            |            |      |        |       |       |    |    |    |
|----|--------------------------------------------|------------|------|--------|-------|-------|----|----|----|
| 27 | Narrow gauge<br>diesel electric locomotive | LDH101     | 1970 | 15     | 2.3   | 3.3   | 10 | 10 | 6  |
| 28 | Diesel locomotive                          | R6         | 1960 | 15.37  | 2.875 | 3.75  | 10 | 7  | 6  |
| 29 | Diesel locomotive                          | S305       | 1966 | 11.23  | 2.667 | 3.6   | 10 | 6  | 6  |
| 30 | Diesel locomotive                          | S405       | 1970 | 12.08  | 2.97  | 3.7   | 10 | 6  | 6  |
| 31 | Diesel locomotive                          | S316       | 1966 | 11.23  | 2.667 | 3.6   | 10 | 6  | 6  |
| 32 | Diesel locomotive                          | S318       | 1966 | 11.23  | 2.667 | 3.6   | 10 | 6  | 6  |
| 33 | Diesel locomotive                          | S201       | 1960 | 12.16  | 2.787 | 3.665 | 10 | 6  | 6  |
| 34 | Diesel locomotive                          | R21        | 1959 | 14.226 | 2.787 | 3.665 | 10 | 5  | 8  |
| 35 | Diesel locomotive                          | R50        | 1959 | 14.226 | 2.787 | 3.665 | 10 | 5  | 8  |
| 36 | Diesel locomotive                          | R71        | 1959 | 14.226 | 2.787 | 3.665 | 10 | 5  | 8  |
| 37 | Diesel locomotive                          | R68        | 1959 | 14.226 | 2.787 | 3.665 | 10 | 5  | 8  |
| 38 | Electric locomotive                        | E101       | 1976 | 15.12  | 2.995 | 4.003 | 10 | 4  | 4  |
| 39 | Diesel passenger railcar                   | 25DR2053   | 1975 | 15.6   | 2.42  | 3.29  | 8  | 8  | 6  |
| 40 | Diesel passenger railcar                   | 25DR2055   | 1975 | 15.6   | 2.42  | 3.29  | 8  | 8  | 6  |
| 41 | Diesel passenger railcar                   | 25DR2056   | 1975 | 15.6   | 2.42  | 3.29  | 8  | 8  | 6  |
| 42 | Diesel passenger railcar                   | 25DR2057   | 1975 | 15.6   | 2.42  | 3.29  | 8  | 8  | 6  |
| 43 | Diesel passenger railcar                   | 25DR2060   | 1975 | 15.6   | 2.42  | 3.29  | 8  | 8  | 6  |
| 44 | Diesel passenger railcar                   | 25DR2067   | 1975 | 15.6   | 2.42  | 3.29  | 8  | 8  | 6  |
| 45 | Diesel passenger railcar                   | 25DR2069   | 1975 | 15.6   | 2.42  | 3.29  | 8  | 8  | 6  |
| 46 | Diesel passenger railcar                   | 35DR2102   | 1931 | 19.916 | 2.66  | 3.6   | 8  | 8  | 6  |
| 47 | Diesel passenger railcar                   | 35DR2404   | 1969 | 19.916 | 2.66  | 3.6   | 8  | 8  | 6  |
| 48 | Diesel passenger railcar                   | 35DR2752   | 1966 | 20.274 | 2.885 | 3.975 | 8  | 8  | 6  |
| 49 | Diesel passenger railcar                   | 35DR2009   | 1985 | 15.6   | 2.42  | 3.29  | 8  | 8  | 6  |
| 50 | Diesel passenger railcar                   | 35DR2010   | 1985 | 15.6   | 2.42  | 3.29  | 8  | 8  | 6  |
| 51 | Diesel passenger railcar                   | 35DR2652   | 1955 | 19.916 | 2.784 | 3.6   | 8  | 8  | 6  |
| 52 | Narrow gauge<br>diesel passenger railcar   | LDR2201    | 1958 | 19.916 | 2.6   | 3.6   | 8  | 8  | 6  |
| 53 | Narrow gauge<br>diesel passenger railcar   | LDR2204    | 1958 | 19.916 | 2.6   | 3.6   | 8  | 8  | 6  |
| 54 | Narrow gauge<br>diesel passenger railcar   | LDR2307    | 1968 | 19.916 | 2.6   | 3.6   | 8  | 8  | 8  |
| 55 | Ziqiang<br>Electric Combined railcar       | ET115      | 1978 | 20.09  | 2.802 | 4.17  | 8  | 6  | 10 |
| 56 | Luggage railvan                            | 40BK32406  | 1969 | 20     | 2.865 | 3.953 | 6  | 6  | 6  |
| 57 | Luggage railvan                            | 40BK32409  | 1969 | 20     | 2.865 | 3.953 | 6  | 6  | 6  |
| 58 | Luggage railvan                            | 35BK32353  | 1967 | 17     | 2.865 | 3.953 | 6  | 10 | 8  |
| 59 | Luggage railvan                            | 35BK32952  | 1970 | 20     | 2.865 | 3.953 | 6  | 8  | 10 |
| 60 | Checking Engineering car                   | 30EOB32389 | 1978 | 20     | 2.865 | 3.953 | 4  | 10 | 8  |
| 61 | Engineering car                            | 30ES32375  | 1995 | 17     | 2.865 | 3.953 | 4  | 10 | 8  |
| 62 | Engineering car                            | 10ES17001  | 1978 | 7.85   | 2.762 | 3.721 | 4  | 10 | 8  |
| 63 | Engineering car                            | 10EW11     | 1931 | 6.286  | 2.1   | 2.863 | 4  | 10 | 8  |
| 64 | Engineering car                            | 15EF19     | 1911 | 8.266  | 2.242 | 2.134 | 4  | 10 | 8  |
| 65 | Large cargo Engineering car                | 30D11      | 1928 | 12.068 | 2.505 | 2.023 | 4  | 8  | 6  |
| 66 | Large cargo Engineering car                | 30D13      | 1935 | 12.068 | 2.505 | 2.023 | 4  | 8  | 8  |
| 67 | Large cargo Engineering car                | 50D11      | 1931 | 21.29  | 2.3   | 1.58  | 4  | 6  | 8  |
| 68 | Oil tank railvan                           | 20L757     | 1961 | 9.142  | 2.25  | 3.754 | 6  | 8  | 10 |
| 69 | Oil tank railvan                           | 30L853     | 1966 | 13.4   | 2.42  | 3.896 | 6  | 8  | 6  |
| 70 | Alternative platform railvan               | 35GF6061   | 1958 | 14.43  | 2.89  | 1.1   | 6  | 10 | 8  |
| 71 | Platform railvan                           | 35F20133   | 1975 | 14.43  | 2.89  | 1.1   | 6  | 4  | 6  |



|    |                                           |          |      |        |       |       |   |    |   |
|----|-------------------------------------------|----------|------|--------|-------|-------|---|----|---|
| 72 | Platform railvan                          | 35F20106 | 1975 | 14.43  | 2.89  | 1.1   | 6 | 4  | 6 |
| 73 | Platform railvan                          | 50F108   | 1962 | 15.5   | 2.89  | 1.2   | 6 | 8  | 6 |
| 74 | Platform railvan                          | 35F20146 | 1975 | 14.43  | 2.89  | 1.1   | 6 | 4  | 6 |
| 75 | Platform railvan                          | 35F20003 | 1975 | 14.43  | 2.89  | 1.1   | 6 | 4  | 6 |
| 76 | Caravan railvan                           | 35C21305 | 1971 | 14.08  | 2.874 | 3.607 | 6 | 6  | 6 |
| 77 | Caravan railvan                           | 25C10008 | 1939 | 13.95  | 2.75  | 3.84  | 6 | 8  | 8 |
| 78 | Caravan railvan                           | 25C10077 | 1939 | 13.95  | 2.75  | 3.84  | 6 | 8  | 8 |
| 79 | Caravan railvan                           | 25C10056 | 1939 | 13.95  | 2.75  | 3.84  | 6 | 8  | 8 |
| 80 | Caravan railvan                           | 10C1216  | 1920 | 7.85   | 2.762 | 3.721 | 6 | 10 | 8 |
| 81 | Refrigerated truck (railvan)              | 10R104   | 1928 | 8      | 2.785 | 3.74  | 6 | 10 | 8 |
| 82 | Ventilation railvan                       | 15V2016  | 1970 | 7.78   | 2.48  | 3.88  | 6 | 4  | 8 |
| 83 | Livestock cart(railvan)                   | 10K524   | 1967 | 7.85   | 2.637 | 3.722 | 6 | 10 | 8 |
| 84 | Caboose railvan                           | 3CK1573  | 1967 | 7.85   | 2.6   | 3.902 | 6 | 4  | 6 |
| 85 | Caboose railvan                           | 3CK2109  | 1982 | 8.58   | 2.64  | 3.65  | 6 | 6  | 6 |
| 86 | Gondola railvan                           | 35G20060 | 1969 | 14.316 | 2.809 | 2.753 | 6 | 4  | 6 |
| 87 | Narrow gauge molasses carts               | LFT7602  | 1945 | 5.83   | 2.15  | 2.85  | 6 | 10 | 8 |
| 88 | Narrow gauge flat railvan                 | LCFC9706 | 1970 | 11.3   | 2.6   | 1.8   | 6 | 8  | 6 |
| 89 | Alishan Cargo Flat railvan                | 15F6006  | 1913 | 9      | 2.3   | 1.8   | 6 | 10 | 8 |
| 90 | Narrow gauge steel body railvan           | LCC5801  | 1923 | 7.01   | 2.749 | 2.134 | 6 | 8  | 6 |
| 91 | Narrow gauge steel-body gondola (railvan) | LOC7170  | 1969 | 5.11   | 2.25  | 1.66  | 6 | 8  | 8 |
| 92 | Narrow gauge wooden caravan(railvan)      | LCC5006  | 1963 | 4.88   | 1.92  | 2.72  | 6 | 10 | 6 |
| 93 | Narrow gauge wooden gondola(railvan)      | LOC7363  | 1929 | 5.868  | 2.286 | 1.368 | 6 | 10 | 6 |
| 94 | Narrow gauge wooden caravan(railvan)      | LCC5521  | 1929 | 5.87   | 2.38  | 2.69  | 6 | 10 | 6 |
| 95 | ballast preparation engineering car       | PBR201   | 1992 | 99.6   | 2.78  | 3.2   | 4 | 4  | 6 |
| 96 | ballast preparation engineering car       | PBC800   | 1992 | 64     | 2.7   | 3.07  | 4 | 4  | 6 |

**Table S3.** The attributions of buildings in Taipei Railway Workshop.

| No | Name                         | Length | Width | Area | Story | Total Area | Height | Year |
|----|------------------------------|--------|-------|------|-------|------------|--------|------|
| 1  | Main office                  | 70     | 12    | 840  | 2     | 1680       | 7.26   | 1959 |
| 2  | Small auditorium             | 42     | 12    | 504  | 2     | 1008       | 8.36   | 1967 |
| 3  | Union office                 | 38     | 10    | 380  | 2     | 760        | 8.36   | 1959 |
| 4  | Rear wing of the main office | 15     | 8     | 120  | 2     | 240        | 7.26   | 1959 |
| 5  | Training center              | 16     | 16    | 256  | 2     | 512        | 7.26   | 1959 |
| 6  | Electric 2 west factory      | 120    | 24    | 2880 | 1     | 2880       | 12.23  | 1962 |
| 7  | Diesel factory               | 84     | 38.4  | 3226 | 1     | 3226       | 14.54  | 1962 |
| 8  | Diesel-electric bogie yard   | 33     | 24    | 792  | 1     | 792        | 12.42  | 1978 |
| 9  | Chipping field               | 16.4   | 11    | 174  | 1     | 173        | 4.00   | --   |
| 10 | Combustion engine factory    | 22.2   | 20    | 444  | 1     | 444        | 9.26   | 1962 |
| 11 | Diesel paint field           | 45     | 6     | 263  | 1     | 263        | 5.88   | 1978 |
| 12 | Assembly factory             | 168    | 24    | 4032 | 1     | 4032       | 14.86  | 1991 |
| 13 | Machine factory              | 168    | 15    | 2520 | 1     | 2520       | 13.70  | 1991 |
| 14 | Dianyi factory               | 67     | 15    | 992  | 1     | 992        | 11.86  | 1991 |

|                  |                             |       |           |      |   |        |              |      |
|------------------|-----------------------------|-------|-----------|------|---|--------|--------------|------|
| 15               | Machine factory             | 108   | 15        | 1598 | 1 | 1598   | <b>11.86</b> | 1991 |
| 16               | Underground lathe           | 42    | 10        | 420  | 1 | 420    | 5.77         | 1945 |
| 17               | Power laboratory            | 18    | 10        | 180  | 1 | 180    | 6.45         | 1991 |
| 18               | Assembly and power shop     | 25    | 15        | 375  | 1 | 375    | 6.22         | 1991 |
| 19               | warehouse                   | 15    | 12        | 180  | 1 | 180    | 7.76         | 1951 |
| 20               | Prime engineering room      | 48    | 15        | 720  | 1 | 720    | <b>11.90</b> | 1991 |
| 21               | Forge factory               | 60    | <b>49</b> | 2940 | 1 | 2940   | 9.00         | 1933 |
| 22               | Shop for trains in and out  | 66    | <b>24</b> | 1584 | 1 | 1584   | <b>11.28</b> | 1959 |
| 23               | Car workshop 1              | 57    | <b>24</b> | 1368 | 1 | 1368   | <b>16.80</b> | 1991 |
| 24               | Car workshop 2              | 48    | <b>24</b> | 1152 | 1 | 1152   | <b>12.69</b> | 1991 |
| 25               | Sheet metal shop 1          | 123   | <b>24</b> | 2952 | 1 | 2952   | <b>12.69</b> | 1991 |
| 26               | Sheet metal shop 2          | 123   | <b>33</b> | 4059 | 1 | 4059   | <b>18.19</b> | 1959 |
| 27               | Railcar parts shop          | 129   | <b>66</b> | 8514 | 1 | 8514   | <b>18.19</b> | 1959 |
| 28               | Material field 1            | 24    | 16        | 384  | 2 | 768    | 7.87         | 1971 |
| 29               | Material field 2            | 95    | <b>18</b> | 1710 | 2 | 3420   | 9.15         | 1933 |
| 30               | Material field 3            | 48    | 15        | 720  | 3 | 2160   | 10.00        | 1959 |
| 31               | Material field 4            | 15    | 15        | 225  | 2 | 450    | 7.00         | 1971 |
| 32               | Supply plant office         | 70    | 12        | 840  | 2 | 1680   | 7.00         | --   |
| 33               | Welfare agency              | 24    | 10        | 240  | 2 | 480    | 9.16         | 1959 |
| 34               | Auditorium                  | 66.48 | <b>42</b> | 1596 | 1 | 1596   | <b>12.06</b> | 1959 |
| 35               | Guard room                  | 15    | 10        | 150  | 1 | 150    | 3.60         | 1959 |
| 36               | Material warehouse          | 9     | 8         | 72   | 2 | 144    | 3.60         | --   |
| 37               | Garage                      | 13    | 13        | 169  | 1 | 169    | 3.60         | --   |
| 38               | Bathhouse                   | 73    | 6         | 240  | 1 | 240    | 3.91         | 1959 |
| 39               | Wings of bathhouse          | 58    | 12        | 696  | 1 | 696    | 3.91         | 1959 |
| 40               | Machine garage              | 34    | <b>20</b> | 680  | 1 | 680    | 9.15         | --   |
| 41               | General factory             | 32    | 14        | 448  | 1 | 448    | 7.50         | 1959 |
| 42               | General workshop wing       | 15    | 10.8      | 165  | 1 | 165    | 3.93         | 1959 |
| 43               | Assemble beam repair yard   | 48    | <b>20</b> | 960  | 1 | 960    | 8.10         | 1970 |
| 44               | Electric field 2 (East)     | 48    | <b>38</b> | 1824 | 1 | 1824   | <b>18.45</b> | 1970 |
| 45               | Air conditioner repair shop | 36    | <b>25</b> | 900  | 1 | 900    | <b>11.75</b> | 1933 |
| 46               | Bearing center              | 36    | 6         | 216  | 1 | 216    | 5.33         | 1961 |
| 47               | Material field 7            | 20    | 10        | 200  | 1 | 200    | 4.50         | 1961 |
| 48               | Cylinder center             | 20    | 15        | 300  | 1 | 300    | 6.91         | 1961 |
| 49               | Wooden mold shop            | 21    | 15        | 315  | 3 | 945    | <b>10.34</b> | 1933 |
| 50               | paint workshop              | 100   | <b>24</b> | 2400 | 1 | 2400   | <b>11.7</b>  | 1978 |
| 51               | Material field 8            | 20    | <b>20</b> | 400  | 1 | 400    | 5.68         | 1961 |
| 52               | Material field 9            | 20    | <b>20</b> | 400  | 1 | 400    | 4.63         | 1961 |
| 53               | Material field 10           | 25    | 15        | 375  | 1 | 375    | 7.12         | 1978 |
| Total floor area |                             |       |           |      |   | 67,730 |              |      |

Source: Adapted from TRA. Note: (1) the width of a building wall that surpassed 17 m is in Body Text; (2) the height of a story that surpasses 10 m is in Body Text; (3) the building, whose width and the height are both complied with the aforementioned containments, is a candidate as exhibition gallery; (4) the candidate buildings are marked in a green row; (5) the building for a model example of exhibition gallery is marked in an orange row; (6) the symbol "--" means no data.

#### Algorithm S1. The calculating process of scores of layout instances for ELP.

1. Generating parent layout instance

Select four trains from the objects database at random, one by one, as the Parent I. Select another four trains from the objects database at random again as Parent II.

(i) Parent I:

$$\Phi \text{ Story\_score } (\lambda_{\text{Story}}) = (10, 6, 6, 8)/4 = 7.5$$

$$\Omega \text{ Year\_score } (\lambda_{\text{Year}})$$

$$Y1 = [(2020-1912)/(2020-1904)] \times 10 = 9.31$$

$$Y2 = [(2020-1975)/(2020-1904)] \times 10 = 3.88$$

$$Y3 = [(2020-1975)/(2020-1904)] \times 10 = 3.88$$

$$Y4 = [(2020-1921)/(2020-1904)] \times 10 = 8.53$$

$$\text{Year\_score } (\lambda_{\text{Year}}) = (9.31 + 3.88 + 3.88 + 8.53)/4 = 6.4$$

$$\Theta \text{ Sort\_score } (\lambda_{\text{Sort}}) = (8, 8, 8, 8)/4 = 8$$

$$\Phi \text{ Rarity\_score } (\lambda_{\text{Rarity}}) = (10, 8, 8, 9)/4 = 8.75$$

$$\Theta \text{ Space-gap\_score } (\lambda_{\text{Space-gap}})$$

$$L1 = 10 - |(20 - 16.4)| = 6.4, W1 = 10 - |(3 - 2.7)| = 9.7$$

$$L2 = 10 - |(20 - 15.6)| = 5.6, W2 = 10 - |(3 - 2.42)| = 9.42$$

$$L3 = 10 - |(20 - 15.6)| = 5.6, W3 = 10 - |(3 - 2.42)| = 9.42$$

$$L4 = 10 - |(20 - 16.54)| = 6.54, W4 = 10 - |(3 - 2.74)| = 9.74$$

$$\text{Space-gap\_score } (\lambda_{\text{Space-gap}}) = (6.4 + 9.7 + 5.6 + 9.42 + 5.6 + 9.42 + 6.54 + 9.74)/8 = 7.8$$

$$\Theta \text{ Ratio\_score } (\lambda_{\text{Ratio}})$$

$$\text{Area1} = 16.4 \times 2.7 = 44.28$$

$$\text{Area2} = 15.6 \times 2.42 = 37.75$$

$$\text{Area3} = 15.6 \times 2.42 = 37.75$$

$$\text{Area4} = 16.54 \times 2.74 = 45.32$$

$$\text{Floor area of exhibition gallery: } 84 \times 38.4 = 3225.6$$

$$\text{Ratio\_score } (\lambda_{\text{Ratio}}) = [(44.28 + 37.75 + 37.75 + 25.3)/3225.6] \times 100\% = 5.12$$

$$\text{Total score of Parent I } (\lambda_{\text{I}}^{(*)}) = (7.5 + 6.4 + 8 + 8.75 + 7.8 + 5.12)/6 = 7.26$$

(ii) Parent II:

$$\Phi \text{ Story\_score } (\lambda_{\text{Story}}) = (10, 10, 6, 8)/4 = 8.5$$

$$\Omega \text{ Year\_score } (\lambda_{\text{Year}})$$

$$Y1 = [(2020-1967)/(2020-1904)] \times 10 = 4.57$$

$$Y2 = [(2020-1904)/(2020-1904)] \times 10 = 10$$

$$Y3 = [(2020-1985)/(2020-1904)] \times 10 = 3.02$$

$$Y4 = [(2020-1970)/(2020-1904)] \times 10 = 4.31$$

$$\text{Year\_score } (\lambda_{\text{Year}}) = (4.57 + 10 + 3.02 + 4.31)/4 = 5.48$$

$$\Theta \text{ Sort\_score } (\lambda_{\text{Sort}}) = (8, 8, 8, 8)/4 = 8$$

$$\Phi \text{ Rarity\_score } (\lambda_{\text{Rarity}}) = (10, 10, 8, 9)/4 = 9.25$$

#### ⑥ Space-gap \_score ( $\lambda_{\text{Space-gap}}$ )

$$L1 = 10 - |(20 - 20)| = 10, W1 = 10 - |(3 - 2.9)| = 9.9$$

$$L2 = 10 - |(20 - 14)| = 4, W2 = 10 - |(3 - 2.62)| = 9.62$$

$$L3 = 10 - |(20 - 15.6)| = 5.6, W3 = 10 - |(3 - 2.42)| = 9.42$$

$$L4 = 10 - |(20 - 11)| = 1, W4 = 10 - |(3 - 2.3)| = 9.3$$

$$\text{Space-gap\_score } (\lambda_{\text{Space-gap}}) = (10 + 9.9 + 4 + 9.62 + 5.6 + 9.42 + 1 + 9.3)/8 = 7.36$$

#### ⑥ Ratio\_score ( $\lambda_{\text{Ratio}}$ )

$$\text{Area1} = 20 \times 2.9 = 58$$

$$\text{Area2} = 14 \times 2.62 = 36.68$$

$$\text{Area3} = 15.6 \times 2.42 = 37.75$$

$$\text{Area4} = 11 \times 2.3 = 25.3$$

$$\text{Floor area of exhibition gallery: } 84 \times 38.4 = 3225.6$$

$$\text{Ratio\_score } (\lambda_{\text{Ratio}}) = [(58 + 36.68 + 37.75 + 25.3)/3225.6] \times 100\% = 4.89$$

$$\text{Total score of Parent II } (\lambda_{\text{II}}^{(*)}) = (8.5 + 5.48 + 8 + 9.25 + 7.36 + 4.89)/6 = 7.24$$

#### (iii) Result

The total score of Parent I is 7.26, and the Parent II is 7.24. The Parent I is slightly better than Parent II, but these scores are similar.

### 2. Producing offspring layout instance

Exchange the first and second position trains (genes) in the chromosomes of Parent I and Parent II (Figure 8), and Offspring I and Parent II are produced.

#### (i) Offspring I:

#### ① Story\_score ( $\lambda_{\text{Story}}$ ) = ( 10, 10, 6, 8)/4 = 8.5

#### ② Year\_score ( $\lambda_{\text{Year}}$ )

$$Y1 = [(2020 - 1967)/(2020 - 1904)] \times 10 = 4.57$$

$$Y2 = [(2020 - 1904)/(2020 - 1904)] \times 10 = 10$$

$$Y3 = [(2020 - 1975)/(2020 - 1904)] \times 10 = 3.88$$

$$Y4 = [(2020 - 1921)/(2020 - 1904)] \times 10 = 8.53$$

$$\text{Year\_score } (\lambda_{\text{Year}}) = (4.57 + 10 + 3.88 + 8.53)/4 = 6.75$$

#### ③ Sort\_score ( $\lambda_{\text{Sort}}$ ) = (8, 8, 8, 8)/4 = 8

#### ④ Rarity\_score ( $\lambda_{\text{Rarity}}$ ) = (10, 10, 8, 9)/4 = 9.25

#### ⑥ Space-gap \_score ( $\lambda_{\text{Space-gap}}$ )

$$L1 = 10 - |(20 - 20)| = 10, W1 = 10 - |(3 - 2.9)| = 9.9$$

$$L2 = 10 - |(20 - 14)| = 4, W2 = 10 - |(3 - 2.62)| = 9.62$$

$$L3 = 10 - |(20 - 15.6)| = 5.6, W3 = 10 - |(3 - 2.42)| = 9.42$$

$$L4 = 10 - |(20 - 16.54)| = 6.54, W4 = 10 - |(3 - 2.74)| = 9.74$$

$$\text{Space-gap\_score } (\lambda_{\text{Space-gap}}) = (10 + 9.9 + 4 + 9.62 + 5.6 + 9.42 + 6.54 + 9.74)/8 = 8.1$$

#### ⑥ Ratio\_score ( $\lambda_{\text{Ratio}}$ ):

$$\text{Area1} = 20 \times 2.9 = 58$$

$$\text{Area2} = 14 \times 2.62 = 36.68$$

$$\text{Area3} = 15.6 \times 2.42 = 37.75$$

$$\text{Area4} = 16.54 \times 2.74 = 45.32$$

$$\text{Floor area of exhibition gallery: } 84 \times 38.4 = 3225.6$$

$$\text{Ratio\_score } (\lambda_{\text{Ratio}}) = [(58 + 36.68 + 37.75 + 25.3)/3225.6] \times 100\% = 5.51$$

$$\text{Total score of Parent I } (\lambda_{\text{I}}^{(*)}) = (8.5 + 6.75 + 8 + 9.25 + 8.1 + 5.51)/6 = 7.69$$

#### (ii) Offspring II:

$$\text{① Story\_score } (\lambda_{\text{Story}}) = (10, 6, 6, 8)/4 = 7.5$$

#### ② Year\_score ( $\lambda_{\text{Year}}$ )

$$Y1 = [(2020-1912)/(2020-1904)] \times 10 = 9.7$$

$$Y2 = [(2020-1975)/(2020-1904)] \times 10 = 3.88$$

$$Y3 = [(2020-1985)/(2020-1904)] \times 10 = 3.02$$

$$Y4 = [(2020-1970)/(2020-1904)] \times 10 = 4.31$$

$$\text{Year\_score } (\lambda_{\text{Year}}) = (9.31 + 3.88 + 3.02 + 4.31)/4 = 5.13$$

$$\text{③ Sort\_score } (\lambda_{\text{Sort}}) = (8, 8, 8, 8)/4 = 8$$

$$\text{④ Rarity\_score } (\lambda_{\text{Rarity}}) = (10, 8, 8, 9)/4 = 8.75$$

#### ⑤ Space-gap\_score ( $\lambda_{\text{Space-gap}}$ )

$$L1 = 10 - |(20 - 16.4)| = 6.4, W1 = 10 - |(3 - 2.7)| = 9.3$$

$$L2 = 10 - |(20 - 15.6)| = 5.6, W2 = 10 - |(3 - 2.42)| = 9.42$$

$$L3 = 10 - |(20 - 15.6)| = 5.6, W3 = 10 - |(3 - 2.42)| = 9.42$$

$$L4 = 10 - |(20 - 11)| = 1, W4 = 10 - |(3 - 2.3)| = 9.3$$

$$\text{Space-gap\_score } (\lambda_{\text{Space-gap}}) = (6.4 + 9.7 + 5.6 + 9.42 + 5.6 + 9.42 + 1 + 9.3)/8 = 7.06$$

#### ⑥ Ratio \_ score ( $\lambda_{\text{Ratio}}$ )

$$\text{Area1} = 16.4 \times 2.7 = 44.28$$

$$\text{Area2} = 15.6 \times 2.42 = 37.75$$

$$\text{Area3} = 15.6 \times 2.42 = 37.75$$

$$\text{Area4} = 11 \times 2.3 = 25.3$$

$$\text{Floor area of exhibition gallery: } 84 \times 38.4 = 3225.6$$

$$\text{Ratio\_score } (\lambda_{\text{Ratio}}) = [(44.28 + 37.75 + 37.75 + 25.3)/3225.6] \times 100\% = 4.5$$

$$\text{Total score of Case II'} (\lambda_{\text{II}'}^{(*)}) = (7.5 + 5.13 + 8 + 8.75 + 7.06 + 4.5)/6 = 6.82$$

#### (iii) Result:

The total score of Offspring I is higher than Offspring II. The score of Offspring I is 7.69, which is better than the original score of Parent I (7.26). At the same time, the score of Offspring II after crossover is 6.82, which is worse than the original score of Parent II (7.24). In other words, Offspring I is a good option for mutation.

### 3. Mutating layout instance

If the third position train (gene) is replaced with another train (DR688, 1940), and count type scores to distinguish and compare the parent and generations.

(i) Story\_score ( $\lambda_{\text{Story}}$ ) = (10, 10, 10, 8)/4 = 9.5

(ii) Year\_score ( $\lambda_{\text{Year}}$ )

$$Y1 = [(2020 - 1967)/(2020 - 1904)] \times 10 = 4.57$$

$$Y2 = [(2020 - 1904)/(2020 - 1904)] \times 10 = 10$$

$$Y3 = [(2020 - 1940)/(2020 - 1904)] \times 10 = 6.9$$

$$Y4 = [(2020 - 1921)/(2020 - 1904)] \times 10 = 8.53$$

$$\text{Year\_score } (\lambda_{\text{Year}}) = (4.57 + 10 + 6.9 + 8.53)/4 = 7.5$$

(iii) Sort\_score ( $\lambda_{\text{Sort}}$ ) = (8, 8, 10, 8)/4 = 8.5

(iv) Rarity\_score ( $\lambda_{\text{Rarity}}$ ) = (10, 10, 10, 9)/4 = 9.75

(v) Space-gap \_score ( $\lambda_{\text{Space-gap}}$ )

$$L1 = 10 - |(20 - 20)| = 10, W1 = 10 - |(3 - 2.9)| = 9.9$$

$$L2 = 10 - |(20 - 14)| = 4, W2 = 10 - |(3 - 2.62)| = 9.62$$

$$L3 = 10 - |(20 - 19.73)| = 9.73, W3 = 10 - |(3 - 2.89)| = 9.89$$

$$L4 = 10 - |(20 - 16.54)| = 6.54, W4 = 10 - |(3 - 2.74)| = 9.74$$

$$\text{Space-gap\_score } (\lambda_{\text{Space-gap}}) = (10 + 9.9 + 4 + 9.62 + 9.73 + 9.89 + 6.54 + 9.74)/8 = 8.68$$

(vi) Ratio\_score ( $\lambda_{\text{Ratio}}$ ):

$$\text{Area1} = 20 \times 2.9 = 58$$

$$\text{Area2} = 14 \times 2.62 = 36.68$$

$$\text{Area3} = 19.73 \times 2.89 = 57.02$$

$$\text{Area4} = 16.54 \times 2.74 = 45.32$$

$$\text{Floor area of exhibition gallery: } 84 \times 38.4 = 3225.6$$

$$\text{Ratio\_score } (\lambda_{\text{Ratio}}) = [(58 + 36.68 + 57.02 + 45.32)/3225.6] \times 100\% = 6.11$$

$$\text{Total score of Offspring I' } (\lambda_{I'(*)}) = (9.5 + 7.5 + 8.5 + 9.75 + 8.68 + 6.11)/6 = 8.34$$

(vii) Result:

After the mutation of the better Offspring I, the total score of Offspring I' (8.34) is higher than Offspring I, and gets optimization result. The Offspring I' is much better than the original score of Parent I (7.26). Then, the list of the next generation after mutation is rewritten in Table 9.
